# Supplementary material for: Solar-driven CO2-to-ethanol conversion enabled by continuous CO2 transport via a superhydrophobic Cu2O nano fence
Source: Royal Society of Chemistry journal article supplement (doi:10.1039/d3sc05702j), 2023-11-27
Supplement: d3sc05702j1.pdf [file d3sc05702j1.pdf]

## Electronic Supplementary Information

### **Solar-driven CO<sub>2</sub>-to-ethanol conversion enabled by continuous CO<sub>2</sub> transport via a superhydrophobic Cu<sub>2</sub>O nano fence**

Hailing Huo,<sup>a</sup> Hua He,<sup>b</sup> Chengxi Huang,<sup>a</sup> Xin Guan,<sup>b</sup> Fang Wu,<sup>c</sup> Yongping Du,<sup>a</sup> Hongbin Xing,<sup>a</sup> Erjun Kan,<sup>\*a</sup> and Ang Li<sup>\*a</sup>

a H. Huo, Prof. C. Huang, Dr. Y. Du, H. Xing, Prof. E. Kan, Prof. A. Li

MIT Key Laboratory of Semiconductor Microstructure and Quantum Sensing, School of Science

Nanjing University of Science and Technology

Nanjing 210094, P. R. China

E-mail: liang2100@njust.edu.cn

ekan@njust.edu.cn

b H. He, X. Guan

State Key Laboratory of Heavy Oil Processing and College of Chemical Engineering

China University of Petroleum (East China)

Qingdao 266580, P. R. China.

c Prof. F. Wu

College of Information Science and Technology

Nanjing Forestry University

Nanjing 210037, P. R. China.

## Contents

|                                                                                                                                                            |                |
|------------------------------------------------------------------------------------------------------------------------------------------------------------|----------------|
| <b>Experimental Procedures .....</b>                                                                                                                       | <b>4 - 9</b>   |
| Chemicals                                                                                                                                                  |                |
| Sample preparation                                                                                                                                         |                |
| Instrumentation                                                                                                                                            |                |
| Supplementary tests                                                                                                                                        |                |
| Computational details                                                                                                                                      |                |
| <b>Results and Discussion .....</b>                                                                                                                        | <b>10 - 48</b> |
| <b>Fig. S1</b> Morphologies and wettability of CSS and O-CSS.                                                                                              |                |
| <b>Fig. S2</b> Morphologies and wettability of CNS and O-CNS.                                                                                              |                |
| <b>Fig. S3</b> Photographs of the as-prepared Cu <sub>2</sub> O photocatalysts.                                                                            |                |
| <b>Fig. S4</b> SEM images.                                                                                                                                 |                |
| <b>Fig. S5</b> XPS results of catalysts.                                                                                                                   |                |
| <b>Fig. S6</b> XPS survey results of catalysts.                                                                                                            |                |
| <b>Fig. S7</b> Interaction between 1-dodecanethiol and Cu <sub>2</sub> O.                                                                                  |                |
| <b>Fig. S8</b> Water contact angles of O-CHS.                                                                                                              |                |
| <b>Fig. S9</b> Ag <sup>+</sup> probe experiment for O-CHS.                                                                                                 |                |
| <b>Fig. S10</b> Ag <sup>+</sup> probe experiment for CHS.                                                                                                  |                |
| <b>Fig. S11</b> Light absorption characterizations.                                                                                                        |                |
| <b>Fig. S12</b> Steady-state photoluminescence (PL) characterization.                                                                                      |                |
| <b>Fig. S13</b> Photoelectrochemical characterizations.                                                                                                    |                |
| <b>Fig. S14</b> N <sub>2</sub> adsorption-desorption measurements.                                                                                         |                |
| <b>Fig. S15</b> Schematic of total internal reflection fluorescence microscope (TIRFM) measurements.                                                       |                |
| <b>Fig. S16</b> Schematics for the calculation of the infiltration pressure.                                                                               |                |
| <b>Fig. S17</b> Cu(OH) <sub>2</sub> probe experiments.                                                                                                     |                |
| <b>Fig. S18</b> Pre-treatment process before the CO <sub>2</sub> photoreduction test.                                                                      |                |
| <b>Fig. S19</b> CO <sub>2</sub> dissolution rate.                                                                                                          |                |
| <b>Fig. S20</b> Selectivity of carbon derivatives.                                                                                                         |                |
| <b>Fig. S21</b> Light intensity test.                                                                                                                      |                |
| <b>Fig. S22</b> Original data obtained from gas chromatography (GC).                                                                                       |                |
| <b>Fig. S23</b> Control experiments.                                                                                                                       |                |
| <b>Fig. S24</b> Supplemental overall PCRR performance.                                                                                                     |                |
| <b>Fig. S25</b> Structural characterizations and wettability of O-CHS and CHS after reaction.                                                              |                |
| <b>Fig. S26</b> Top and side views of different configurations.                                                                                            |                |
| <b>Fig. S27</b> Configurations at different *CO coverages.                                                                                                 |                |
| <b>Fig. S28</b> Top and side views of different configurations for CO <sub>2</sub> -to-CH <sub>3</sub> CH <sub>2</sub> OH conversion at high *CO coverage. |                |
| <b>Fig. S29</b> Top and side views of different configurations for CO <sub>2</sub> -to-CH <sub>3</sub> CH <sub>2</sub> OH conversion at low *CO coverage.  |                |
| <b>Fig. S30</b> Top and side views of different configurations for CO <sub>2</sub> -to-CH <sub>3</sub> OH conversion at high *CO coverage.                 |                |
| <b>Fig. S31</b> Top and side views of different configurations for CO <sub>2</sub> -to-CH <sub>3</sub> OH conversion at low *CO coverage.                  |                |
| <b>Fig. S32</b> Reaction mechanism of methanol formation.                                                                                                  |                |
| <b>Table S1</b> Typical photocatalytic systems for CO <sub>2</sub> reduction to ethanol                                                                    |                |
| <b>Table S2</b> Fitted parameters obtained from decay curves of the samples                                                                                |                |

|                                                                                                                                                                    |                |
|--------------------------------------------------------------------------------------------------------------------------------------------------------------------|----------------|
| <b>Table S3</b> BET surface areas and pore sizes of all samples                                                                                                    |                |
| <b>Table S4</b> Gibbs free energy change ( $\Delta G$ ) of CO adsorption on the $\text{Cu}_2\text{O}$ (111) surface at different $^*\text{CO}$ coverages           |                |
| <b>Table S5</b> Different intermediates potentially formed with different numbers of $\text{H}^+$ transfers for ethanol generation at high $^*\text{CO}$ coverage  |                |
| <b>Table S6</b> Different intermediates potentially formed with different numbers of $\text{H}^+$ transfers for ethanol generation at low $^*\text{CO}$ coverage   |                |
| <b>Table S7</b> Different intermediates potentially formed with different numbers of $\text{H}^+$ transfers for methanol generation at high $^*\text{CO}$ coverage |                |
| <b>Table S8</b> Different intermediates potentially formed with different numbers of $\text{H}^+$ transfers for methanol generation at low $^*\text{CO}$ coverage  |                |
| <b>Table S9</b> Possible reaction pathway during the overall PCRR to ethanol on the catalyst                                                                       |                |
| <b>Table S10</b> Possible reaction pathway during the overall PCRR to methanol on the catalyst                                                                     |                |
| <b>Table S11</b> Thermochemical data of the reactants and products for the overall PCRR                                                                            |                |
| <b>Reference</b> .....                                                                                                                                             | <b>49 - 50</b> |

## Experimental Procedures

### Chemicals

Copper chloride ( $\text{CuCl}_2 \cdot 2\text{H}_2\text{O}$ , AR), copper bromide ( $\text{CuBr}_2$ , AR), copper sulfate ( $\text{CuSO}_4 \cdot 5\text{H}_2\text{O}$ , AR), tetrabutylammonium bromide ( $(\text{C}_4\text{H}_9)_4\text{NBr}$ , AR), ascorbic acid (AR), 1-dodecanethiol ( $\text{C}_{12}\text{H}_{25}\text{-SH}$ , 99.5%), scopoletin ( $\text{C}_{10}\text{H}_8\text{O}_4$ , 98%), and horseradish peroxidase ( $\geq 500$  units/mg) were purchased from Aladdin. Copper nitrate ( $\text{Cu}(\text{NO}_3)_2 \cdot 3\text{H}_2\text{O}$ , AR) and potassium bicarbonate ( $\text{KHCO}_3$ , AR) were purchased from Macklin. Sodium hydroxide ( $\text{NaOH}$ , AR), ethanol ( $\text{C}_2\text{H}_5\text{-OH}$ , AR), silver nitrate ( $\text{AgNO}_3$ , >99.0%), and ammonium sulfate ( $(\text{NH}_4)_2\text{SO}_4$ , AR) were purchased from Sinopharm Chemical Reagent Co., Ltd. Polyvinylpyrrolidone (PVP, M.W = 30000) was purchased from Shanghai Yuanye Bio-Technology Co., Ltd. Dimethyl sulfoxide (DMSO) was purchased from Sigma-Aldrich. Cy5 NHS ester was purchased from Shanghai So-Fe Biomedicine Co., Ltd. Nafion® D520 dispersion was purchased from 3M Materials®. Deionized water (DI water, 18.25  $\text{M}\Omega \cdot \text{cm}$ ) obtained from a UP Water Purification System was used throughout the experimental processes. All chemicals were obtained from commercial suppliers and used without further purification.

### Sample preparation

**Synthesis of  $\text{Cu}_2\text{O}$  hollow sphere (CHS).** An aqueous solution was first prepared by mixing 20 mL of DI water, 0.4 mL of PVP solution (M.W = 30000, 1.0 wt %), 2.0 mL of  $(\text{C}_4\text{H}_9)_4\text{NBr}$  solution (0.1 M), and 0.2 mL of  $\text{CuCl}_2$  solution (0.1 M). Then 1.0 mL of ascorbic acid solution (0.1 M) was added to the solution. The mixture was stirred for 3 min and became turbid shortly. Afterwards, 1.0 mL of  $\text{NaOH}$  solution (0.2 M) was added to the above turbid precursor solution under stirring, and the resulting solution was then kept for 15 min at room temperature without stirring. The resultant  $\text{Cu}_2\text{O}$  product was collected through centrifugation, washed with DI water and ethanol several times, and finally dried in a vacuum oven.

**Synthesis of  $\text{Cu}_2\text{O}$  solid sphere (CSS).** 28.6 mg of  $\text{Cu}(\text{NO}_3)_2 \cdot 3\text{H}_2\text{O}$  and 57.8 mg of  $(\text{NH}_4)_2\text{SO}_4$  were added to 50 mL of DI water and stirred for 5 min. Then 2.0 mL of a 0.2 M  $\text{NaOH}$  solution was dropwise injected into the above solution and stirred magnetically for 2 min, followed by the dropwise addition of 3.5 mL of ascorbic acid (0.1 M). Finally, the solution was stirred for an additional 13 min. The resultant  $\text{Cu}_2\text{O}$  product was collected through centrifugation, washed with DI water and ethanol several times, and finally dried in a vacuum oven.

**Synthesis of  $\text{Cu}_2\text{O}$  nanosheets derived from fragmented CHS (CNS).** The synthetic process of CNS was similar to that of CHS. The difference was that the standing time was extended from 15 min to 45 min.

**Surface modification to synthesize superhydrophobic  $\text{Cu}_2\text{O}$  structures.** The as-prepared  $\text{Cu}_2\text{O}$  samples of CHS, CSS, and CNS were all treated with 1-dodecanethiol (DDT) to obtain superhydrophobic samples. The resulting superhydrophobic  $\text{Cu}_2\text{O}$  structures were denoted as O-CHS, O-CSS, and O-CNS, respectively. In a typical procedure, 10 mg of  $\text{Cu}_2\text{O}$  was ultrasonically dispersed in 10 mL of ethanol, followed by the injection of 7  $\mu\text{L}$  of DDT. The mixture was then gently stirred at room temperature for 15 min. The resultant superhydrophobic  $\text{Cu}_2\text{O}$  was collected through centrifugation, washed with ethanol several times, and finally dried in a vacuum oven.

### Instrumentation

Transmission electron microscope (TEM) was performed using a JEOL JEM 2100F electron microscope. Scanning electron microscope (SEM) was performed on Hitachi SU8220. Crystalline structures were evaluated by X-ray diffraction (XRD) analysis using a Bruker D8 Focus operating at 40 kV and 40 mA, equipped with a nickel-filtered  $\text{Cu K}\alpha$  radiation ( $\lambda = 1.54056 \text{ \AA}$ ). Specific surface areas and pore structures of catalysts were measured using Micromeritics ASAP 2460 through nitrogen adsorption at 77 K. The specific surface areas were calculated from the isotherms using the BET method. The pore distribution was obtained by the BJH method from the adsorption branch of the adsorption isotherms. Room temperature steady-state photoluminescence (PL) spectra were performed on FL 970 fluorescence spectrophotometer under the excitation wavelength of 350 nm with a 510 nm filter.

Time-resolved PL spectra were performed on a HITACHI F-7100 fluorescence spectrophotometer under an excitation wavelength of 350 nm. UV-vis diffuse reflectance spectra were recorded using UV-2600 under the visible light of 400-800 nm. Reflectivity was used to measure light absorption through the conversion of the Kubelka-Munk formula, and BaSO<sub>4</sub> was used as the reference sample. X-ray photoelectron spectroscopy (XPS) was performed on Thermo Fischer, ESCALAB 250Xi with Al K X-ray source to reveal chemical states, and the binding energies (BE) were calibrated using the C 1s electron peak (BE = 284.8 eV). Raman spectra were recorded using Raman spectrometer DXR2. In situ Fourier transform infrared spectroscopy (FTIR) spectra were performed on Thermo Fisher Nicolet IS50. Water contact angles were measured using an SDC-350 instrument with the samples uniformly dispersed on glass substrates using ethanol as solvent. The volume of the water droplet was 7  $\mu$ L, and the final results were average values obtained from more than three positions. Total internal reflection fluorescent microscope (TIRFM) measurements were carried out on Nikon A1.

### Supplementary tests

**Ag<sup>+</sup> probe experiment.** Ag<sup>+</sup> probe experiments were conducted to confirm that the hydrophobic treatment did not hinder the migration of charge carriers to the catalyst surface. Ag<sup>+</sup> (derived from AgNO<sub>3</sub>) and methanol were used as the probe ion and positive charge scavenger, respectively. Typically, 15 mg of catalysts (O-CHS or CHS) was dispersed in 30 mL of H<sub>2</sub>O. Then 15 mL of methanol and 250  $\mu$ L of AgNO<sub>3</sub> solution (20 mg mL<sup>-1</sup>) were added. After stirring and evacuation for 0.5 h, the mixture was irradiated with a 300 W Xe lamp ( $\lambda > 420$  nm) for 3 h. The Ag-loaded catalyst was obtained after centrifugation, washing, and drying procedures. During the experiment, Ag<sup>+</sup> would be reduced to Ag particles by the photogenerated electrons migrating to the catalyst surface. Therefore, by comparing the amount of deposited Ag on O-CHS and CHS, the amount of photogenerated electrons transferred to the catalyst surface can be compared.

**Photoelectrochemical measurement.** Photoelectrochemical measurements were conducted using a CHI-660E electrochemical workstation from China. The measurements were performed in a standard three-electrode configuration, with the prepared samples serving as the working electrode, a platinum plate as the counter electrode, and the standard Ag/AgCl electrode as the reference. A 0.2 M Na<sub>2</sub>SO<sub>4</sub> aqueous solution was used as the electrolyte. The working electrode was prepared as follows: 8 mg catalyst was dispersed in 2 ml of H<sub>2</sub>O, 2 ml of isopropanol, and 190  $\mu$ L of Nafion® D520 dispersion. Then 100  $\mu$ L of the aforementioned mixture was dropped onto an FTO glass with an area of 1 cm<sup>2</sup>. The photocurrent of the samples was measured under a 300 W Xe lamp (PLS-SXE300, PerfectLight, China) irradiation equipped with a 420 nm cutoff filter. The light on/off cycle was set to 10 s. Electrochemical impedance spectroscopy (EIS) was conducted in a frequency range from 0.1 Hz to 100 kHz.

**Total internal reflection fluorescent microscope measurement.** Total internal reflection fluorescence microscope (TIRFM) measurements were carried out on Nikon A1. The specific procedure was as follows. Firstly, Cy5 NHS ester was dissolved in DMSO with a concentration of 85 mM. Then 1  $\mu$ L of Cy5 NHS ester solution (85 mM in DMSO) was added to 2 mL of H<sub>2</sub>O to form aqueous solution A. Moreover, 5 mg of catalyst was dispersed into 1 mL of H<sub>2</sub>O, and then 10  $\mu$ L of solution A was added to form solution B. After that, solution B was wrapped in tinfoil to avoid exposure to light and placed in the refrigerator overnight. Afterwards, 100  $\mu$ L of the obtained solution B was dropped on a cleaned coverslip. After 2 h, the coverslip was placed on the TIRFM for imaging using direct stochastic optical reconstruction microscopy with an excitation of 635 nm.

**Calculation of the infiltration pressure required for water to penetrate the pores.** To verify the nano-fence effect of O-CHS, the pressure-driven infiltration behavior of water into the catalyst's pores was investigated. The applicability of the Young-Laplace (Y-L) equation has been demonstrated to be valid in the nanoscale regime, rendering it a widely accepted tool for describing capillary pressure phenomena associated with pore sizes at the nanoscale level.<sup>1, 2</sup> Accordingly, the infiltration pressure is calculated using the Y-L equation, expressed by equation (1).<sup>3</sup>

$$\Delta P = P_{\text{interior}} - P_{\text{exterior}} = 2\gamma/R \quad (1)$$

where  $P_{\text{interior}}$  and  $P_{\text{exterior}}$  represent the pressure on the inner and outer sides of the liquid surface in the pore, respectively.  $\Delta P$  refers to the Laplace pressure (infiltration pressure), which is the pressure difference across the liquid interface.  $\gamma$  is the surface tension of the liquid and  $R$  is the radius of curvature of the liquid surface.

For the hydrophobic material ( $\theta > 90^\circ$ ), as illustrated in Fig. S16a to S16c, water advancing inside the pore will form a convex liquid surface due to its surface tension. In this case, the direction of  $\Delta P_1$  is from the gas phase to the liquid phase, preventing water from entering the pores. Moreover,  $R = a / \sin(\theta - 90^\circ)$ . Here,  $a$  is the radius of the pore and  $\theta$  is the contact angle that the liquid makes on the sidewall of the pore. For the hydrophilic material ( $\theta < 90^\circ$ ), as illustrated in Fig. S16d to S16f, water advancing inside the pore will form a concave liquid surface. In this case, the direction of  $\Delta P_2$  is from the liquid phase to the gas phase, pushing water into the pores. Moreover,  $R = a / \cos\theta$ .

In this study,  $\gamma$  is approximated by the surface tension of water, which is  $74.92 \text{ mN m}^{-1}$  at the photoreaction temperature of  $5^\circ\text{C}$ .<sup>4</sup>  $\theta$  is approximated by the water contact angle of the catalyst. For O-CHS with  $\theta$  of  $152.24^\circ$ ,  $\Delta P_1 = 2\gamma \sin(\theta - 90^\circ) / a$ . Whereas for CHS with  $\theta$  of  $43.96^\circ$ ,  $\Delta P_2 = 2\gamma \cos\theta / a$ . Consequently, the infiltration pressure is inversely proportional to pore size.

**CO<sub>2</sub> photoreduction test.** The performance of catalysts for overall PCRR were evaluated using Labsolar 6A (PerfectLight, China) and gas chromatography (GC, Agilent 8890, America).

Prior to illumination, 20 mg of catalysts was added to 100 mL of KHCO<sub>3</sub> (0.1 M) aqueous solution without using hole scavengers. The mixture was magnetically stirred in a double-layer Pyrex glass reactor (PerfectLight, China). The superhydrophobic catalysts would float on the aqueous solution, while a suspension would form for the hydrophilic catalysts. The reactor was then connected to Labsolar 6A, constituting the system for photoreduction tests (Fig. S18a to S18c). Then the system was evacuated to 0.5 kPa. Subsequently, compressed CO<sub>2</sub> (99.999%), which was controlled by a mass flow controller (LZB-3WB, China), was bubbled into the reactor to raise the system pressure to 80 kPa. The system was then evacuated again. This extraction-inflation operation was repeated three times to remove as much air as possible. Finally, pure CO<sub>2</sub> was continuously bubbled through the solution again at a  $40 \text{ mL min}^{-1}$  flow rate for approximately 30 min to raise the CO<sub>2</sub> pressure to 80 kPa under constant stirring at  $250 \text{ r min}^{-1}$ . Then the system was maintained for 40 min to reach CO<sub>2</sub> dissolution equilibrium. The extraction-inflation and dissolution processes are schematically shown in Fig. S18d to S18g. No additional CO<sub>2</sub> was injected into the closed system during the reaction. A 300 W Xe lamp (PLS-SXE300, PerfectLight, China) equipped with a 420 nm cutoff filter was then used as the visible light source through the quartz window. The distance between the light source and the quartz window was kept constant at 10 cm. The photoreaction temperature was maintained at  $5^\circ\text{C}$  using a chiller (CNSHP DC-0506, China) for cooling water circulation. The reaction was typically conducted for 6 h, and 0.5 mL of liquid products was taken out using a syringe every hour for subsequent analysis. Comparative experiments were carried out under the similar experimental conditions.

The amounts of gaseous and liquid products evolved were all determined using GC. Gas products were directly detected by GC, which was equipped with a thermal conductivity detector (TCD), a flame ionization detector (FID), and a methanation reactor. For liquid products, the samples obtained at each hour were injected into GC through a headspace sampler (APL HS-20, China) for analysis. Specifically, 200  $\mu\text{L}$  of the extracted liquid was mixed with 5 mL of H<sub>2</sub>O in each headspace bottle, and then the bottle was placed into the headspace sampler. The liquid products were automatically injected into the GC for detection. An external standard was used to calculate the amount of each component based on the peak area of GC.

Careful calculation is required to determine the amount of O<sub>2</sub>. The presence of a potential air leak during the reaction introduces the possibility of O<sub>2</sub> from the ambient air entering the reaction system, leading to inaccuracies in determining the generated O<sub>2</sub> content. To mitigate this error, calibration was performed by comparing the O<sub>2</sub> content generated from the reaction with the N<sub>2</sub> content, allowing for the accurate determination of the actual amount of generated O<sub>2</sub>. Specifically, as N<sub>2</sub> cannot be generated from the overall PCRR, the detection of N<sub>2</sub> in the GC signifies its origin as air leakage. Considering a volume ratio of 20.9: 78.1 for O<sub>2</sub> to N<sub>2</sub> in ambient air, the quantity (mL) of O<sub>2</sub> resulting from air leakage can be determined based on the corresponding volume (mL) of N<sub>2</sub>. Consequently, the volume (mL) of O<sub>2</sub> generated by the reaction can be obtained by subtracting the volume (mL) of O<sub>2</sub> caused by air leakage.

**Cu(OH)<sub>2</sub> probe experiment.** To further verify the nano-fence effect of O-CHS to prevent water from entering the hollow space, the Cu(OH)<sub>2</sub> precipitate was used as the probe for O-CHS and CHS. Typically, 10 mg of the catalyst was dispersed in 10 mL of H<sub>2</sub>O. Then, 200  $\mu\text{L}$  of Cu(SO<sub>4</sub>)<sub>2</sub> solution (0.2 M) was added, followed by stirring for 0.5 h to allow complete entry of Cu<sup>2+</sup> into the interior of the catalyst through the pores. Next, 200  $\mu\text{L}$  of NaOH solution (1 M) was added, resulting in the formation of blue

flocculent precipitates, namely  $\text{Cu}(\text{OH})_2$ . After 5 min of stirring, the resultant sample was collected through centrifugation, and subsequently washed multiple times with  $\text{H}_2\text{O}$  and ethanol. During this experiment, if  $\text{Cu}^{2+}$  ions are able to permeate the interior of the hollow structure of catalysts through the pores with the aqueous solution, the addition of NaOH solution would cause the formation of precipitated particles both inside and outside the hollow structure. After the centrifugal washing process, the precipitated particles outside the hollow structure would be removed, while those within the hollow structure would be retained. Conversely, if the aqueous solution fails to penetrate the interior of the hollow structure,  $\text{Cu}^{2+}$  will not be able to enter, resulting in the absence of precipitation particles inside the hollow structure. Consequently, the presence or absence of precipitated particles inside the hollow structure can serve as an indicator for determining the permeability of water into the internal region of the hollow structure.

**$\text{CO}_2$  dissolution rate test.** To verify that the dissolution rate of  $\text{CO}_2$  in aqueous solutions with hydrophobic catalysts is more favorable compared to systems with hydrophilic catalysts, the temperature and pressure changes of the photoreduction measurement system during the dissolution of  $\text{CO}_2$  (Fig. S18g) were recorded in detail. The recorded data was then used to calculate the quantities of  $\text{CO}_2$  present in both the gas and liquid phases of the system at different dissolution times. As described in  **$\text{CO}_2$  photoreduction test** and Fig. S18, the system underwent several processes of extraction and inflation. Consequently, during the dissolution of  $\text{CO}_2$ , the pressure value displayed on the Labsolar 6A actuator (Fig. S18b) was the real-time  $\text{CO}_2$  pressure in the gas phase of the system. Thus, if the change of pressure and temperature over time during  $\text{CO}_2$  dissolution could be recorded, the change in the amount of  $\text{CO}_2$  in the gas phase could be calculated using the van der Waals equation. Since the system was composed of Labsolar 6A and a reactor, the temperatures of the two parts were not the same. Therefore, the system should be divided into two parts to calculate. For Labsolar 6A, the corresponding temperature was displayed on the actuator (Fig. S18b). While for the reactor (Fig. S18c), the temperature was maintained constant at 5 °C through cooling water circulation. Notably, during the testing process, we maintained strict control over several parameters. The quantity of catalyst employed remained constant at 20 mg, while the rate at which  $\text{CO}_2$  was introduced into the system was fixed at 40 mL  $\text{min}^{-1}$ . To measure and regulate this gas flow, we utilized a mass and volumetric gas flow meter from Omega (model FMA-1604A). Additionally, we ensured that the stirring speed was set at a constant rate of 250  $\text{r min}^{-1}$  by utilizing a magnetic stirrer manufactured by JOANLAB (model MS-10L). Furthermore, we maintained a consistent temperature of 5 °C for the solution in the reactor by employing a chiller (CNSHP DC-0506, China) to circulate cooling water. By carefully controlling these external factors, we aimed to eliminate their potential influence on the experimental outcomes. The van der Waals equation is expressed as equation (2):

$$(P + n^2a / V^2) (V - nb) = nRT \quad (2)$$

where  $P$  is the pressure of the system displayed on the Labsolar 6A actuator.  $n$  is the amount of  $\text{CO}_2$  in the gas phase.  $V$  is the volume of gas.  $R$  is the molar gas constant.  $T$  is the temperature.  $a$  and  $b$  are the van der Waals constants. For  $\text{CO}_2$ ,  $a = 0.3658 \text{ Pa}\cdot\text{m}^6 \text{ mol}^{-2}$ ,  $b = 0.429 \times 10^{-4} \text{ m}^3\cdot\text{mol}^{-1}$ .  $n$  is calculated using Mathematica software.

For the part of Labsolar 6A,  $V_1$  is 100 mL, and  $P_1$  and  $T_1$  are both displayed on the actuator. For the part of the reactor, the total volume of the reactor is 370 mL, but the aqueous solution occupies a volume of 100 mL. Thus, the volume occupied by  $\text{CO}_2$  in the gas phase of the reactor ( $V_2$ ) is 270 mL. Furthermore,  $T_2$  for this part is 5 °C. Since the pressure of the system is in equilibrium,  $P_2$  is equal to  $P_1$ . The sum of corresponding  $n_1$  and  $n_2$  is the total amount of  $\text{CO}_2$  in the gas phase. Hence, the total amount of  $\text{CO}_2$  in the gas phase at different dissolution times can be calculated. The decrease in the total amount of  $\text{CO}_2$  in the gas phase corresponds to the amount of  $\text{CO}_2$  dissolved into the liquid phase. Thus, the relationship between the amount of  $\text{CO}_2$  dissolved into the liquid phase and its dissolution time can be obtained, and that is the dissolution rate of  $\text{CO}_2$ .

**Calculation of selectivity.** The selectivity from the overall PCRR on an electron basis ( $6e^-$  for  $\text{CH}_3\text{OH}$ ,  $12e^-$  for  $\text{CH}_3\text{CH}_2\text{OH}$ ,  $2e^-$  for  $\text{H}_2$ ) was calculated using equations (3) and (4):

$$\text{Selectivity of carbon derivatives (\%)} = (6 n_{\text{methanol}} + 12 n_{\text{ethanol}}) \times 100\% / (6 n_{\text{methanol}} + 12 n_{\text{ethanol}} + 2 n_{\text{hydrogen}}) \quad (3)$$

$$\text{Selectivity of ethanol (\%)} = 12 n_{\text{ethanol}} \times 100\% / (6 n_{\text{methanol}} + 12 n_{\text{ethanol}} + 2 n_{\text{hydrogen}}) \quad (4)$$

where  $n_{\text{methanol}}$ ,  $n_{\text{ethanol}}$ , and  $n_{\text{hydrogen}}$  represent the amounts (moles) of methanol, ethanol, and hydrogen formed within a certain period of time, respectively.

**Calculation of solar-to-ethanol conversion efficiency.** The solar-to-ethanol conversion efficiency (STE) can be quantified as the ratio of the chemical energy output for ethanol production to the solar energy input. It can be calculated using equation (5):<sup>5-7</sup>

$$\text{STE (\%)} = \text{Output energy for ethanol evolved} \times 100\% / \text{Energy of incident solar light} \quad (5)$$

This equation can be further expanded as:

$$\text{STE (\%)} = R_{\text{ethanol}} (\mu\text{mol h}^{-1}) \times \Delta G_r (\text{kJ mol}^{-1}) \times 100\% / P_{\text{average}} (\text{mW cm}^{-2}) \times S (\text{cm}^2)$$

where  $R_{\text{ethanol}}$  indicates the rate of ethanol formation during the overall PCRR.  $\Delta G_r$  represents the Gibbs energy change for the CO<sub>2</sub>-to-ethanol reaction.  $P_{\text{average}}$  is the average irradiation intensity, and  $S$  is the incident irradiation area. For this study,  $S$  is determined to be 38.465 cm<sup>2</sup>.

The irradiation intensity of the 300 W Xe lamp with a cutoff 420 filter was measured using a CEL-FZ-A Optical Power Meter. Five different test positions (Fig. S22) were adopted to determine the average irradiation intensity  $P_{\text{average}}$ , and it was found to be 125.58 mW cm<sup>-2</sup>, following equation (6).<sup>8</sup>

$$P_{\text{average}} = P_{\text{center}} / 3 + 2P_{\text{edge}} / 3 \quad (6)$$

The reaction Gibbs energy change  $\Delta G_r$  can be calculated using equation (7):

$$\Delta G_r = \sum v_i \Delta_f G_i \quad (7)$$

where  $i$  is the stoichiometric coefficient for species  $i$  in the formation reaction.  $\Delta_f G_i$  is the molar Gibbs energy of formation for species  $i$ . In this study, the overall PCRR conditions are approximated as standard states, and the thermodynamic data used are summarized in Table S10.<sup>4</sup>

Considering the CO<sub>2</sub>-to-ethanol reaction with the chemical formula:  $2\text{CO}_2 + 3\text{H}_2\text{O} \rightarrow \text{CH}_3\text{CH}_2\text{OH} + 3\text{O}_2$

Thus,  $\Delta G_r$  can be calculated as follows:

$$\begin{aligned} \Delta G_r &= \Delta_f G_{\text{ethanol}}^\ominus + 3\Delta_f G_{\text{oxygen}}^\ominus - 2\Delta_f G_{\text{carbon dioxide}}^\ominus - 3\Delta_f G_{\text{water}}^\ominus \\ &= (-174.8) \text{ kJ mol}^{-1} - 2 \times (-394.4) \text{ kJ mol}^{-1} - 3 \times (-237.1) \text{ kJ mol}^{-1} = 1325.3 \text{ kJ mol}^{-1} \end{aligned}$$

Combining the value of  $R_{\text{ethanol}}$  ( $996.18 \mu\text{mol g}^{-1} \text{h}^{-1} \times 0.02 \text{ g} = 19.92 \mu\text{mol h}^{-1}$ ), the STE was calculated to be 0.152%.

**Isotope-labeling test.** The isotope labeling experiment was conducted as follows. Firstly, 30 mg of O-CHS was added to 50 mL of NaH<sup>13</sup>CO<sub>3</sub> (0.1 M) solution in the reactor for ultrasonic dispersion. Subsequently, the reactor was connected to Labsolar 6A, sealed, and purged with flowing Ar for 60 min to remove air. Afterwards, <sup>13</sup>CO<sub>2</sub> (99.999%) was introduced into the reactor, raising the final pressure for the reaction to 80 kPa. The reactor was allowed to stabilize for 40 min, after which the overall PCRR was performed for 4 h using a 300 W Xe lamp with a cutoff 420 filter. The products containing C-isotopes were analyzed by GC-MS (Shimadzu QP-2010SE).

**Detection of hydrogen peroxide (H<sub>2</sub>O<sub>2</sub>) in the reaction solution.** The detection of H<sub>2</sub>O<sub>2</sub> in the reaction solution was conducted through a chemiluminescence approach by scopoletin assay.<sup>9, 10</sup> Firstly, the detection solution was prepared by mixing 20 mL of H<sub>2</sub>O, 5 mL of HCl (0.1 M), 500  $\mu\text{L}$  of scopoletin solution (0.7 mg L<sup>-1</sup>), and 1 mL of horseradish peroxidase solution (0.16 mg mL<sup>-1</sup>). Subsequently, 10 mL of the reaction solution obtained after the overall PCRR with different catalysts was added to the detection solution. After incubation for 15 min, the final solution was measured using a fluorescence spectrophotometer with excitation of 350 nm light. A reference experiment was conducted in the same manner, except that 10 mL of H<sub>2</sub>O was added instead of the reaction solution.

**In situ Fourier-transform infrared spectroscopy (FTIR) test.** Diffuse reflection in situ FTIR was used to investigate effective CO<sub>2</sub> adsorption on the catalyst surface and detect possible intermediates during the overall PCRR. 50 mg of the catalyst was loaded onto the sample cell of the diffuse reflectance attachment, ensuring a flat top surface. A cover was fixed on the sample holder to form a reaction space, which was then cleaned by Ar. Then the FTIR data was collected as the background. Subsequently, visible light was introduced into the reaction space through the observation window, and CO<sub>2</sub> was introduced via a container. It should be noted that the container was filled with water to ensure the formation of a water film on the sample powders. FTIR data was collected every 10 min to monitor and record any changes.



**Computational details.**

All optimized geometries and electronic energies based on the spin-polarized density functional theory (DFT) were performed using the Vienna *ab initio* simulation package. The exchange-correlation function was treated within the generalized gradient approximation (GGA) and parameterized by the Perdew-Burke-Ernzerhof (PBE) formula to describe the electronic exchange and correlation effects. Van der Waals interactions were described using the empirical correction in Grimme's scheme (DFT-D3). The cutoff energy for the plane wave basis sets was set to 500 eV, and the Methfessel-Paxton (width = 0.1 eV) was used to calculate the partial occupancies. A vacuum layer with a thickness of 20.00 Å was placed along the vertical direction to avoid spurious interactions. The Brillouin zone integration was performed using a Monkhorst-Pack special k-points mesh of 3×3×1 for all the calculation models. The Cu<sub>2</sub>O (111) surface was constructed, and a 3×3 supercell with three layers was selected as the computational model. During the optimization, the atoms in the bottom two layers were fixed to maintain the bulk structure, while the other atoms in the top layer were allowed to fully relax.

## Results and Discussion

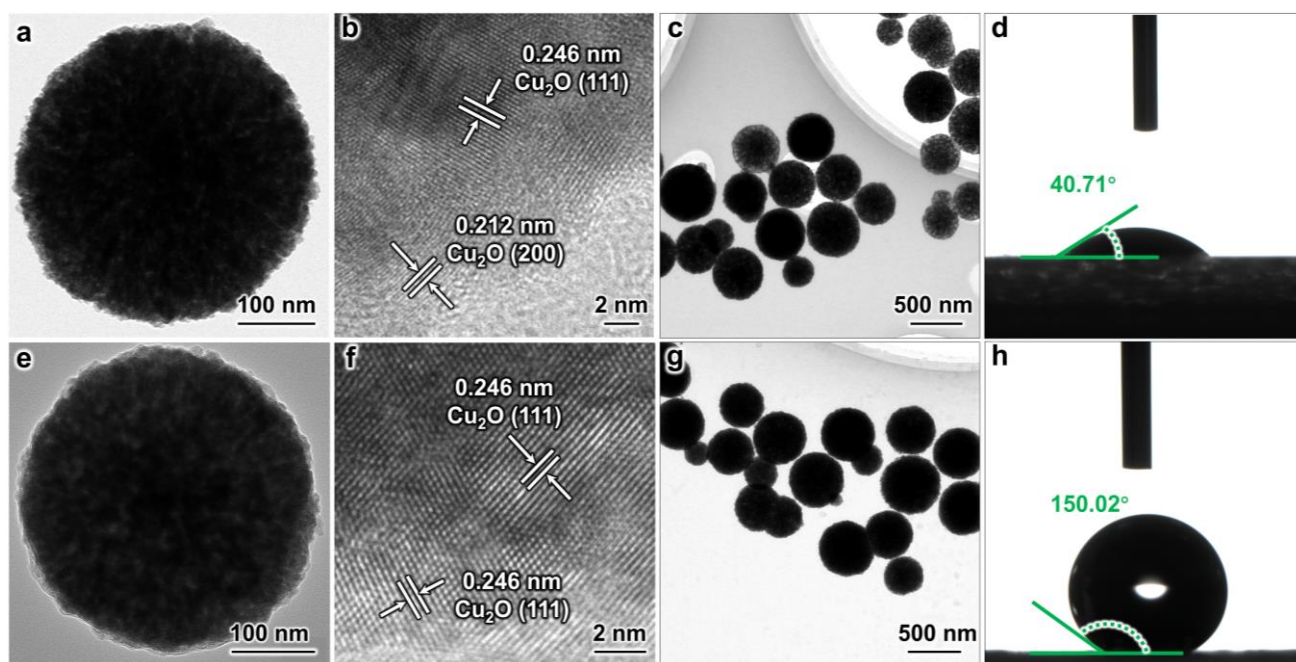

**Fig. S1** Morphologies and wettability of CSS and O-CSS. (a, c) TEM images of CSS. (b) HRTEM image of CSS. (d) WCA of CHS. (e, g) TEM images of O-CSS. (f) HRTEM image of O-CSS. (h) WCA of O-CHS. The lattice spacings of 0.246 nm shown in [Fig.s S1b](#) and [S1f](#) are in good agreement with the (111) planes of  $\text{Cu}_2\text{O}$ , revealing that these structures are all composed of  $\text{Cu}_2\text{O}$  material. Additionally, the lattice spacing of 0.212 nm shown in [Fig. S1b](#), corresponds to the (200) plane of  $\text{Cu}_2\text{O}$ .

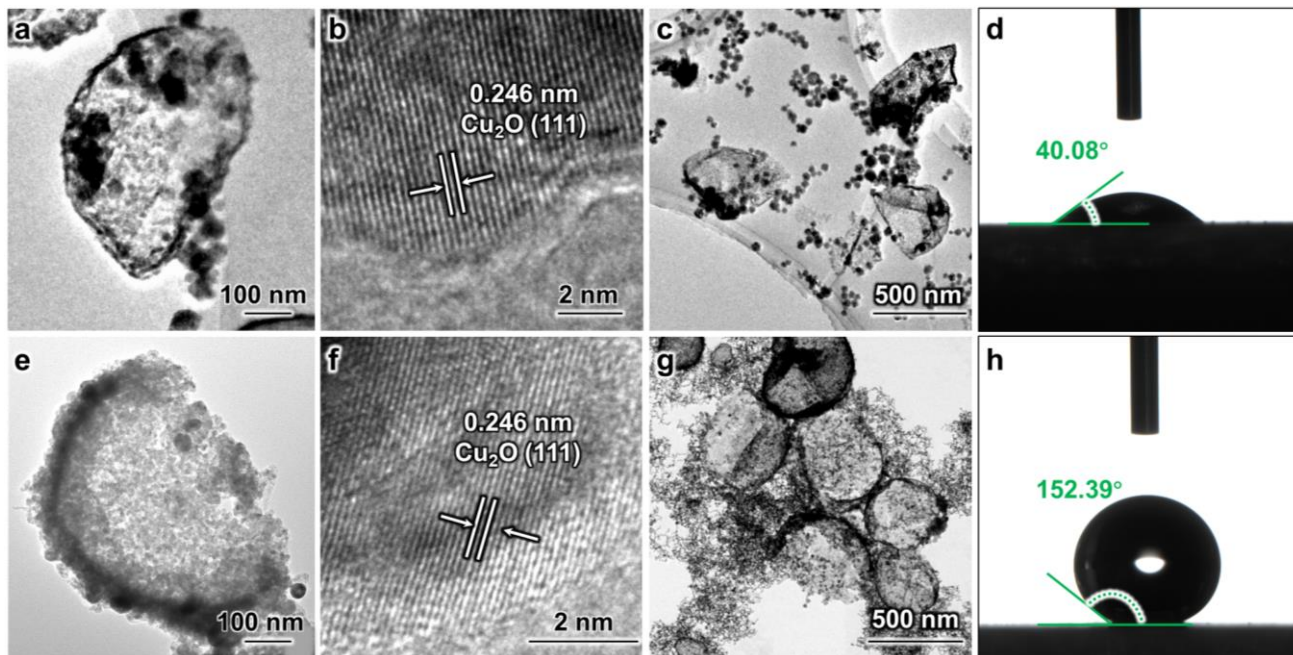

**Fig. S2** Morphologies and wettability of CNS and O-CNS. (a, c) TEM images of CNS. (b) HRTEM image of CNS. (d) WCA of CNS. (e, g) TEM images of O-CNS. (f) HRTEM image of O-CNS. (h) WCA of O-CNS. As depicted in Fig.s S2a and S2c, the morphology of CNS differs from that of CHS. While CHS exhibits a completely hollow spherical structure, CNS appears as an irregular hemispherical shape with a broken spherical structure. This indicates that CNS indeed loses the enclosed hollow structure. Upon hydrophobic modification, the images of O-CNS shown in Fig. S2e to S2g resemble the corresponding images of CNS, suggesting that the hydrophobic modification has no impact on the morphology of O-CNS. Furthermore, the lattice spacings of 0.246 nm shown in Fig.s S2b and S2f align well with the (111) planes of  $\text{Cu}_2\text{O}$ , confirming that these structures are composed of  $\text{Cu}_2\text{O}$  material.

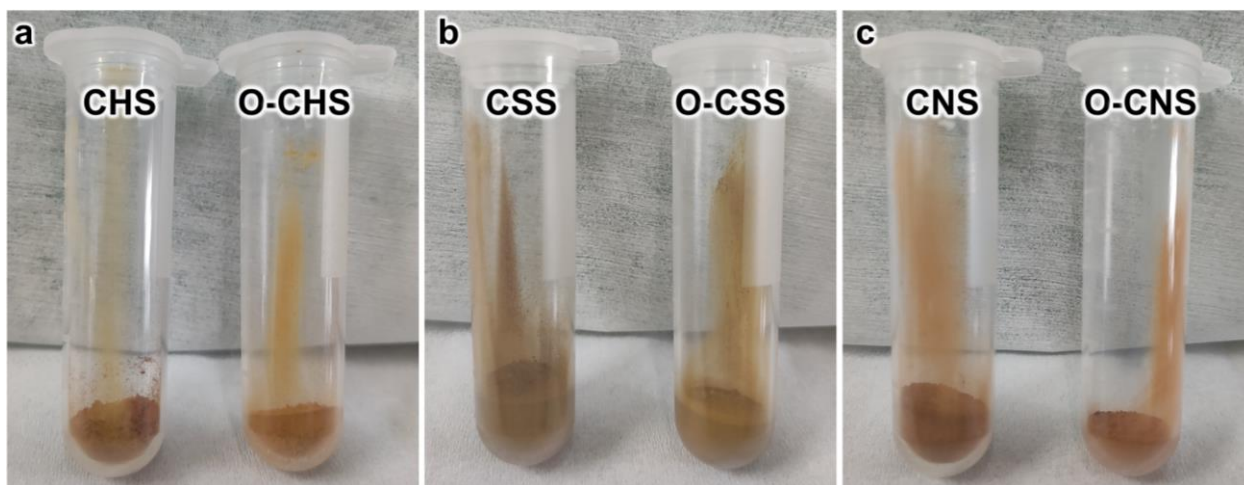

**Fig. S3** Photographs of the as-prepared  $\text{Cu}_2\text{O}$  photocatalysts. (a) CHS and O-CHS. (b) CSS and O-CSS. (c) CNS and O-CNS.

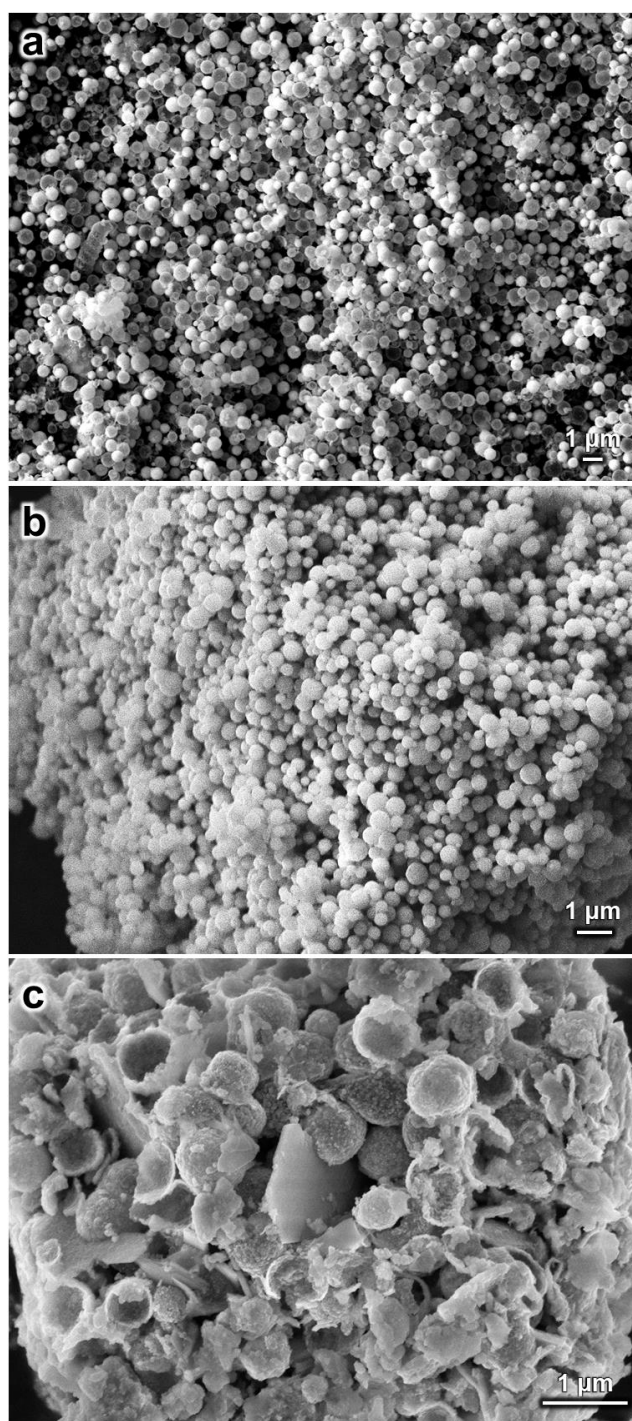

**Fig. S4** SEM images. (a to c) SEM images of the obtained O-CHS, O-CSS, and O-CNS, respectively.

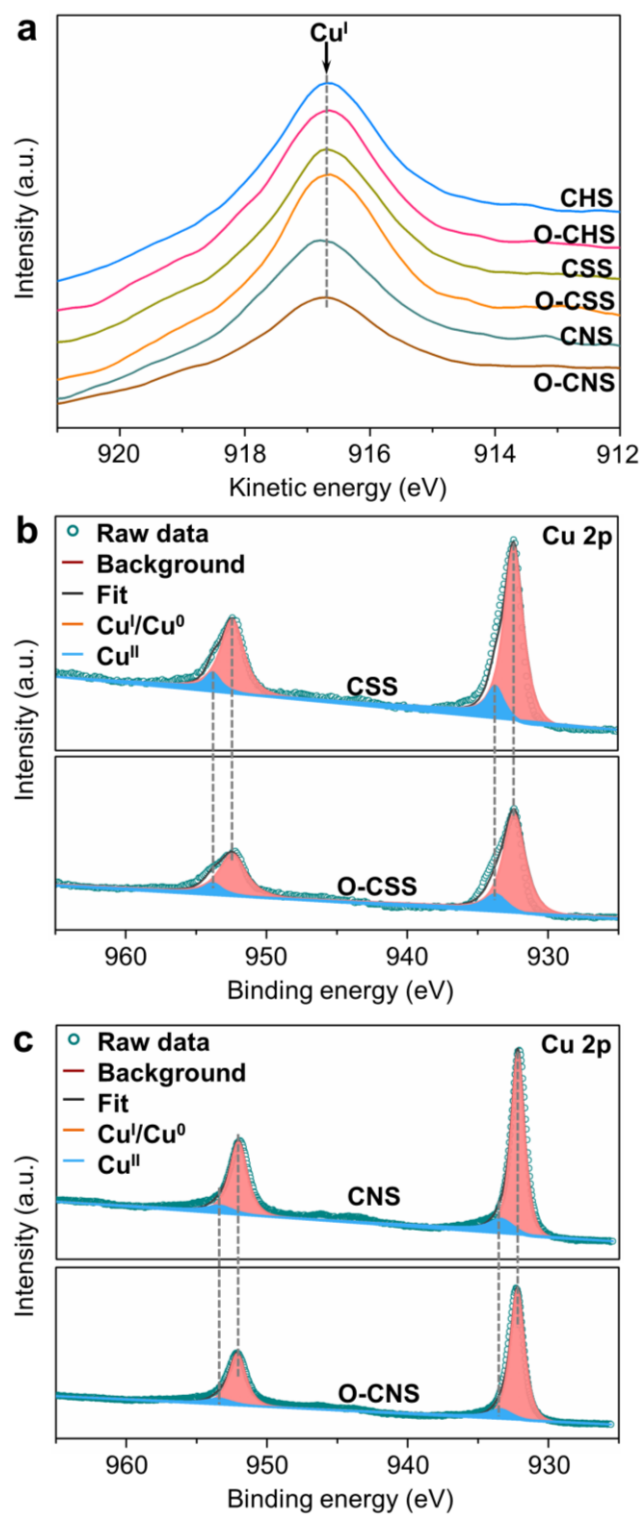

**Fig. S5** XPS results of catalysts. (a) Cu LMM Auger spectra of CHS, O-CHS, CSS, O-CSS, CNS, and O-CNS. (b) High-resolution Cu 2p XPS spectra of CSS and O-CSS. (c) High-resolution Cu 2p XPS spectra of CNS and O-CNS.

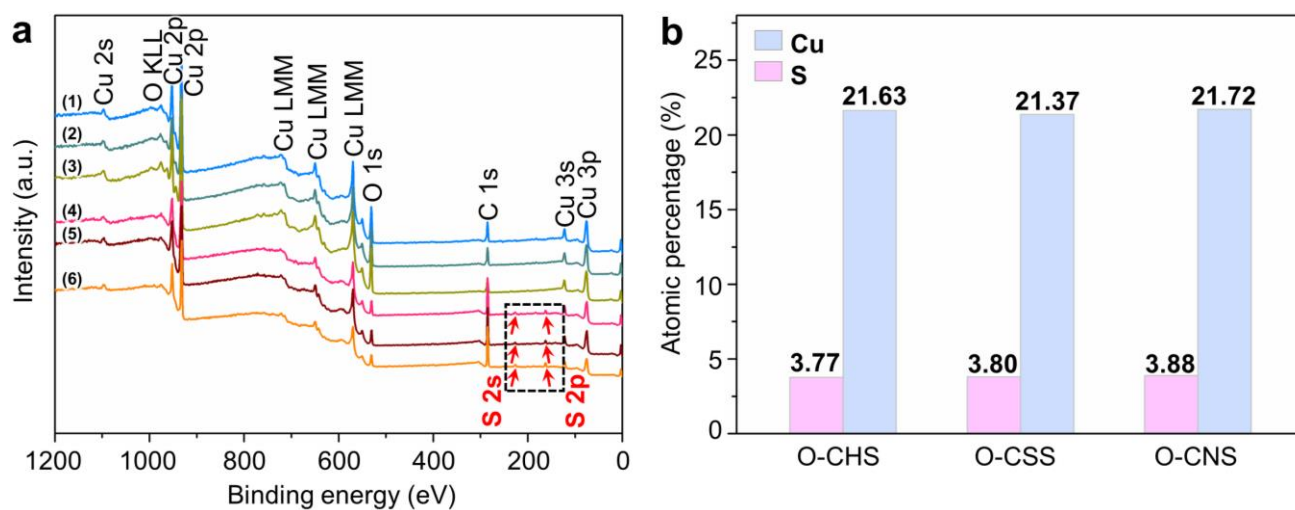

**Fig. S6** XPS survey results of catalysts. (a) XPS survey spectra of CHS (1), CSS (2), CNS (3), O-CHS (4), O-CSS (5), and O-CNS (6). (b) The atomic percentages of S and Cu obtained from XPS measurements for O-CHS, O-CSS, and O-CNS. The low atomic percentages of S show low sulfur contents, suggesting a low amount of DDT used for hydrophobic modification. Additionally, the similar atomic percentages of S and Cu for O-CHS, O-CSS, and O-CNS indicate comparable situations regarding the hydrophobic modification.

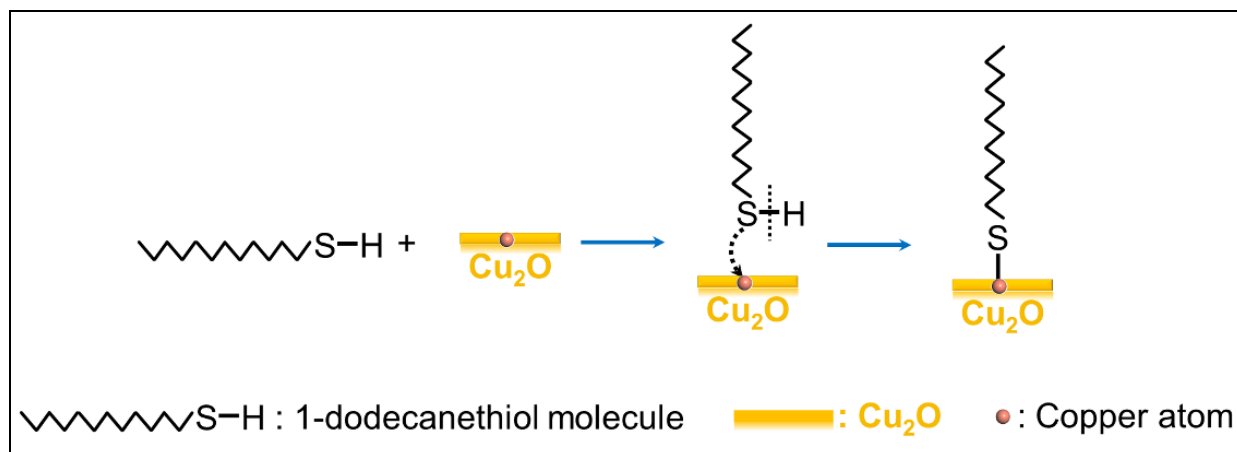

**Fig. S7** Interaction between 1-dodecanethiol and  $\text{Cu}_2\text{O}$ . Schematic of 1-dodecanethiol molecule adsorbed on the  $\text{Cu}_2\text{O}$  surface. During the hydrophobic modification process, the  $-\text{S-H}$  bond in 1-dodecanethiol is broken first, followed by the formation of the  $\text{S-Cu}^{\text{I}}$  bond to graft 1-dodecanethiol onto the surface of  $\text{Cu}_2\text{O}$ .



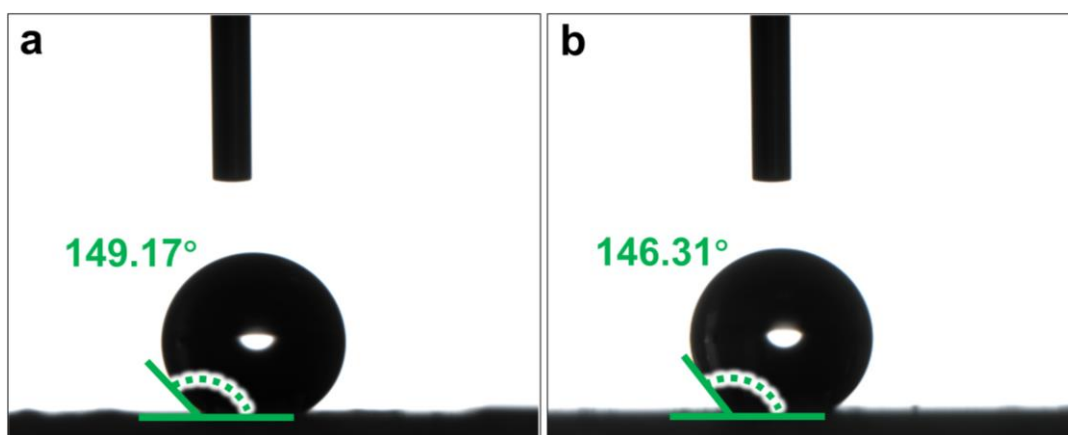

**Fig. S8** Water contact angles of O-CHS. (a) After 6 hours of Xe lamp irradiation. (b) After a prolonged storage period of 20 days.

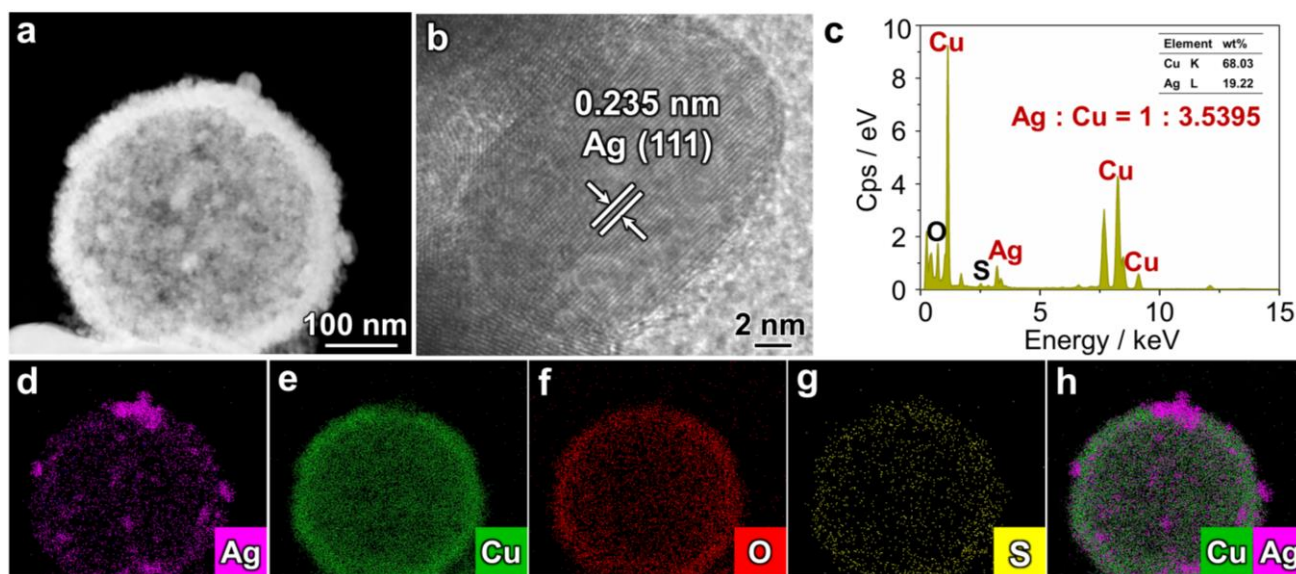

**Fig. S9**  $\text{Ag}^+$  probe experiment for O-CHS. (a) High-angle annular dark field scanning transmission electron microscopy (HAADF-STEM) image, (b) HRTEM image, and (c) EDS spectrum of O-CHS loaded with Ag particles. (d to g) EDS elemental mapping images for Ag, Cu, O, and S of O-CHS loaded with Ag particles, respectively. (h) Cu and Ag overlap signals of O-CHS loaded with Ag particles. A typical lattice distance of 0.235 nm corresponding to the (111) facet of Ag is clearly discernible in Fig. S9b. Furthermore, the EDS mapping images (Fig. S9d to S9h) display the distribution of Ag particles on the O-CHS surface. More importantly, the Ag/Cu ratio for O-CHS (1:3.5395) shown in Fig. S9c is almost equal to that for CHS (1:3.5378) shown in Fig. S10c. This similarity suggests that the charge transfer process from the surface to the adsorbate remains largely unaffected by the hydrophobic treatment. Because during the  $\text{Ag}^+$  probe experiment,  $\text{Ag}^+$  is reduced to Ag particles by the electrons migrating to the catalyst surface, while holes are consumed by the sacrificial methanol. Thus, by comparing the quantity of Ag particles obtained, we can infer the extent of carrier migration to the catalyst surface. Therefore, the comparable Ag/Cu ratios in O-CHS and CHS imply a similar charge transfer situation, indicating that the hydrophobic treatment has no obvious effect on the surface-to-adsorbate charge transfer, which would be due to the small amount of 1-dodecanethiol used.

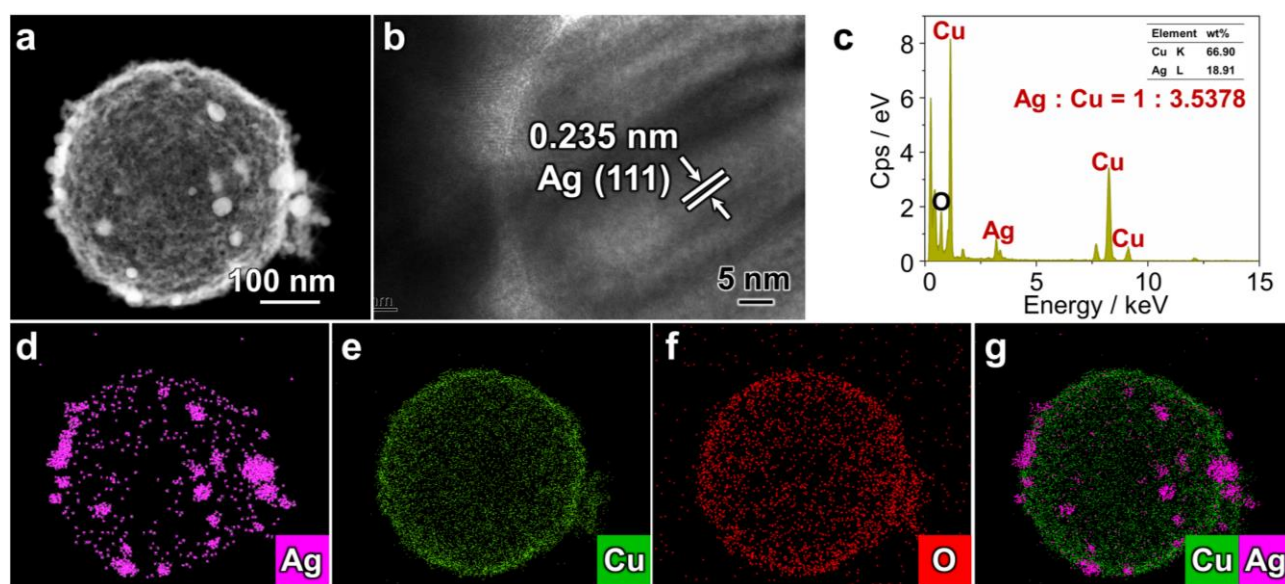

**Fig. S10** Ag<sup>+</sup> probe experiment for CHS. (a) HAADF-STEM image, (b) HRTEM image, and (c) EDS spectrum of CHS loaded with Ag particles. (d to f) EDS elemental mapping images for Ag, Cu, and O of CHS loaded with Ag particles, respectively. (g) Cu and Ag overlap signals of CHS loaded with Ag particles. Similar to Fig. S9, a characteristic lattice distance of 0.235 nm corresponding to the (111) facet of Ag is distinctly observed. The EDS mapping images illustrate the distribution of Ag particles on the CHS surface, thereby confirming the successful synthesis of CHS loaded with Ag particles.

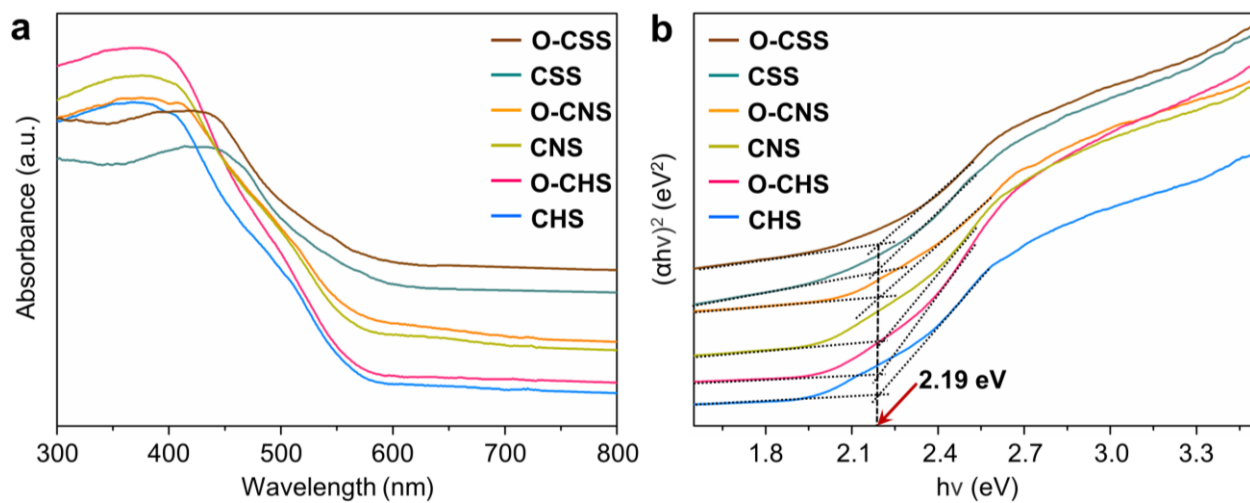

**Fig. S11** Light absorption characterizations. (a) UV-vis diffuse reflectance spectra and (b) Tauc plots of CHS, O-CHS, CSS, O-CSS, CNS, and O-CNS.

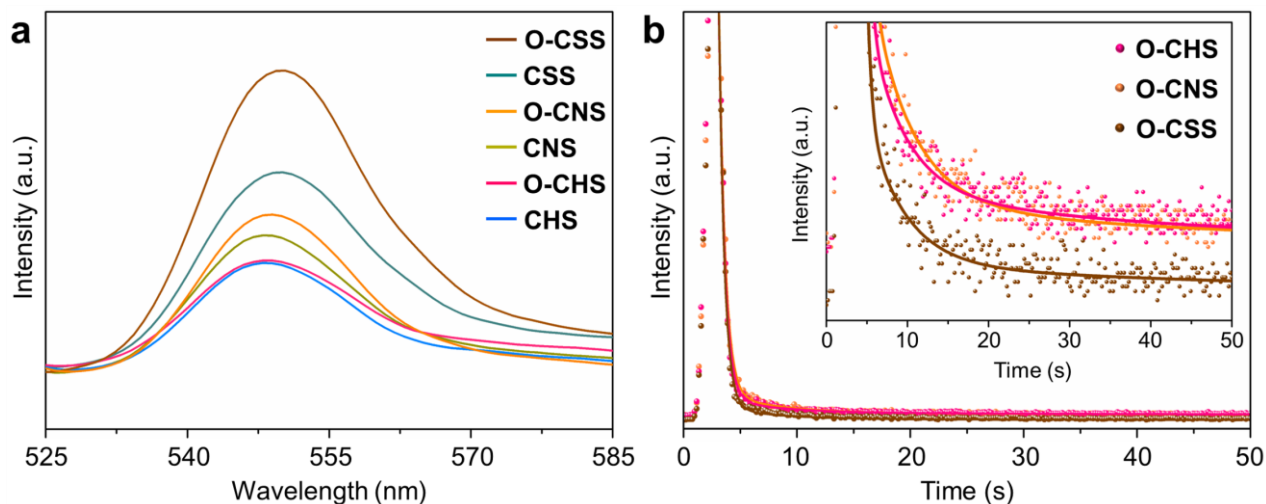

**Fig. S12** Photoluminescence (PL) characterizations. (a) Steady-state PL spectra under 350 nm laser irradiation with a 510 nm filter of CHS, O-CHS, CSS, O-CSS, CNS, and O-CNS. (b) Time-resolved PL spectra (TRPL) of O-CHS, O-CNS, and O-CSS under 350 nm laser irradiation. The decay curves were obtained by fitting the observed data (the dots in Fig. S12b) using the following equations:  $R(t) = B_1 \exp(-t/\tau_1) + B_2 \exp(-t/\tau_2) + B_3 \exp(-t/\tau_3)$ .  $\tau_a = (B_1 \tau_1^2 + B_2 \tau_2^2 + B_3 \tau_3^2) / (B_1 \tau_1 + B_2 \tau_2 + B_3 \tau_3)$ . The corresponding fitted parameters are illustrated in Table S2.

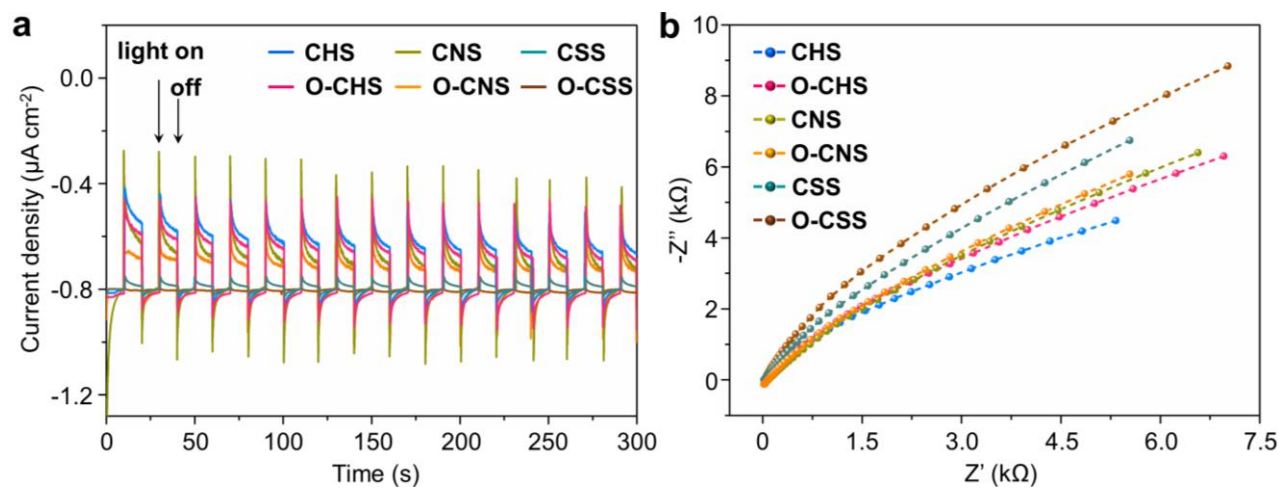

**Fig. S13** Photoelectrochemical characterizations. (a) Transient photocurrent curves of CHS, O-CHS, CSS, O-CSS, CNS, and O-CNS with light on/off cycles under visible light irradiation. (b) Electrochemical impedance spectra (EIS) measured in an aqueous solution of  $\text{Na}_2\text{SO}_4$  (0.02 M) for CHS, O-CHS, CSS, O-CSS, CNS, and O-CNS.

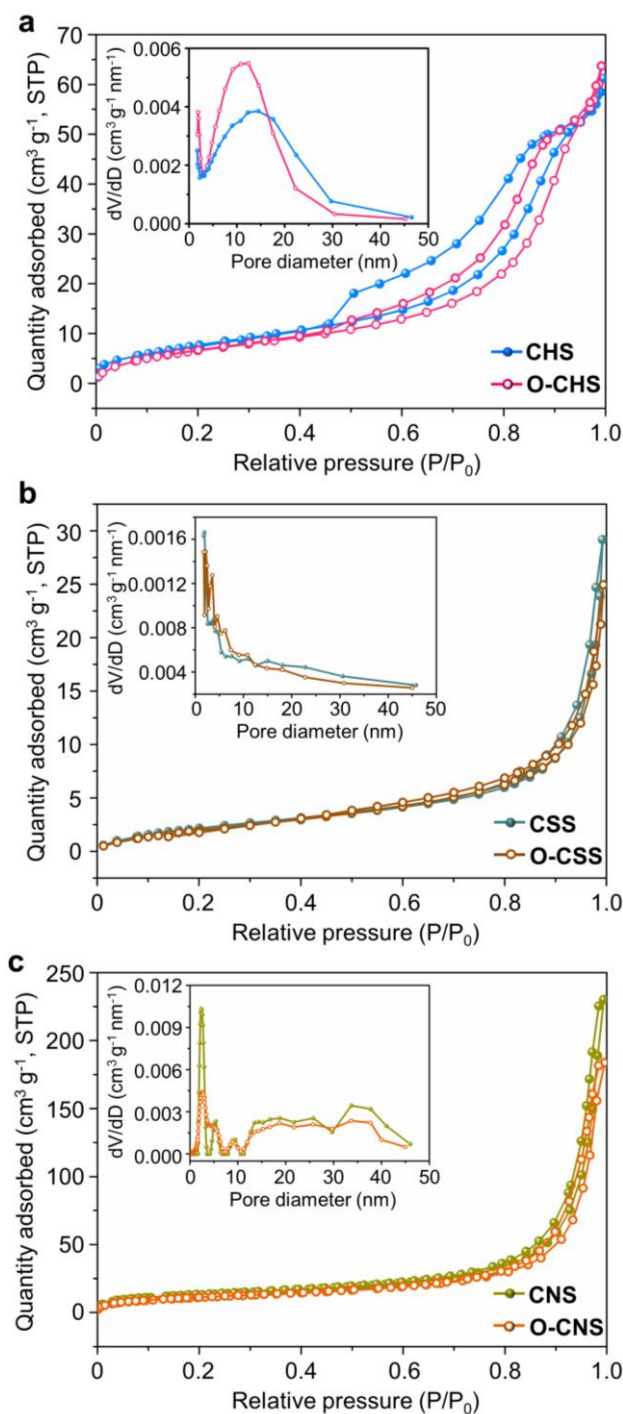

**Fig. S14**  $N_2$  adsorption-desorption measurements.  $N_2$  adsorption-desorption isotherms and pore diameter distributions of (a) CHS and O-CHS, (b) CSS and O-CSS, and (c) CNS and O-CNS. As depicted in Table S2, the BET surface areas of CHS, O-CHS, CNS, and O-CNS are larger than those of CSS and O-CSS, thereby providing more active sites for reactions. This finding can be closely related to the structural advantages associated with the hollow structure and nanosheet morphology. Additionally, when compared to the unmodified CHS, CNS, and CSS, the corresponding modified O-CHS, O-CNS, and O-CSS exhibit slightly decreased BET surface areas and average pore diameters, illustrating the modest impact of hydrophobic modification.

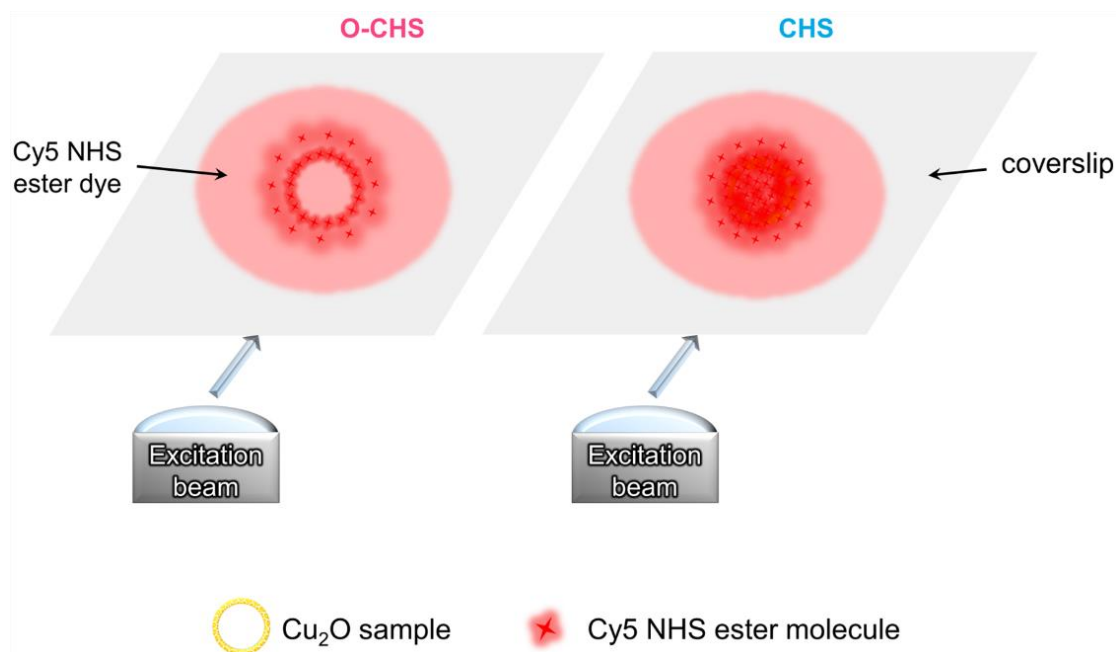

**Fig. S15** Schematic of total internal reflection fluorescence microscope (TIRFM) measurements. The fluorescence performance of O-CHS (left) and CHS (right) after dyeing with Cy5 NHS ester under 635 nm excitation in TIRFM measurements is illustrated in Fig. S15. Theoretically, fluorescent molecules dissolved in water can penetrate into the cavity of CHS through the mesopores. Thus, fluorescence signals would be observed both in the interior and exterior of CHS. Conversely, in the case of O-CHS, the superhydrophobic surface poses a challenge for fluorescent molecules to penetrate the shell and access the cavity. Instead, they tend to accumulate in significant quantities around the shell, leading to high fluorescence intensity in those regions. Additionally, the fluorescent signal near the  $\text{Cu}_2\text{O}$  sample consistently exhibits greater intensity compared to the bulk environment, which may be attributed to the adsorption effect of solid  $\text{Cu}_2\text{O}$  samples on the dyes.<sup>11, 12</sup>



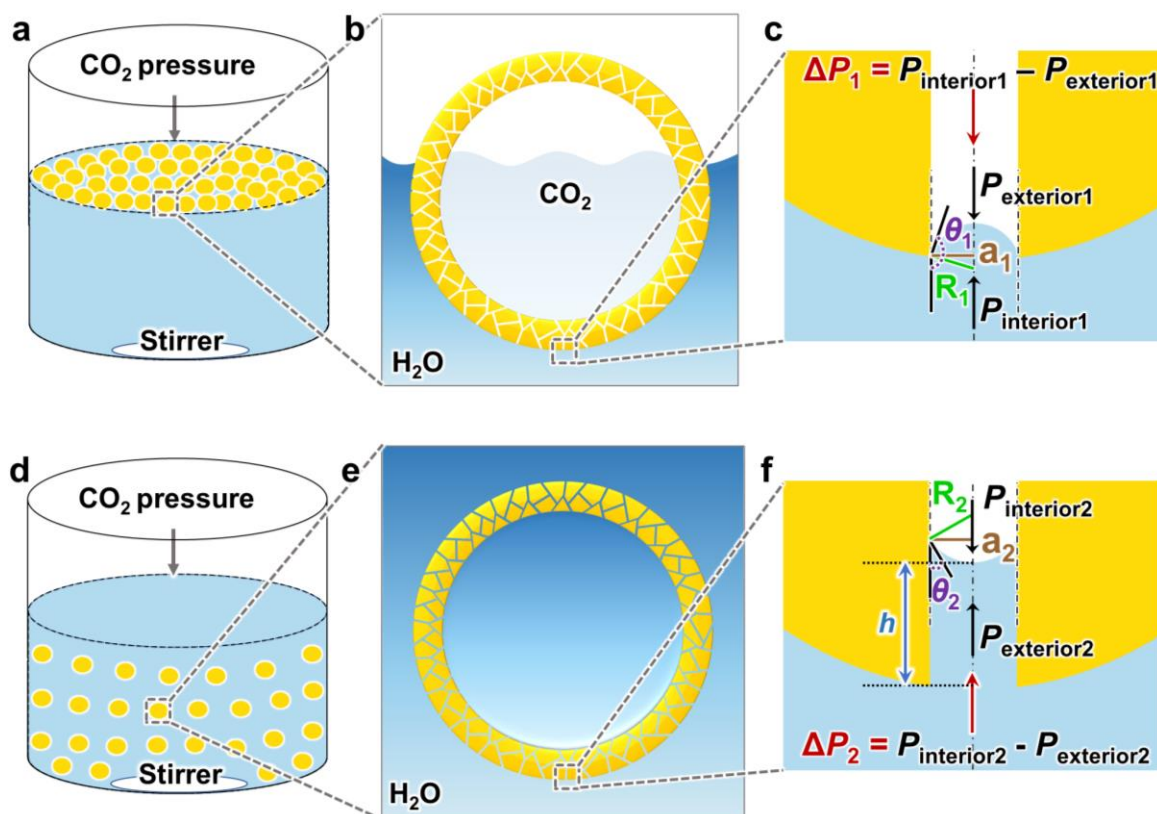

**Fig. S16** Schematics for the calculation of the infiltration pressure. (a, d) Schematics of O-CHS and CHS in the reactor, respectively. (b, e) Single particle magnified schematics of O-CHS and CHS in the aqueous solution, respectively. (c, f) Schematics of the liquid-gas interface advancing inside the pore in O-CHS and CHS, respectively. O-CHS is floating on the aqueous solution and CHS is suspended in the aqueous solution.  $\Delta P_1$  and  $\Delta P_2$  can be calculated according to the detailed description in **Experimental Procedures. Calculation of the infiltration pressure required for water to penetrate the pores.** To maintain hydrostatic equilibrium within CHS, the induced capillary pressure ( $\Delta P_2$ ) will be balanced by the height ( $h$ ) of the liquid column rising in the pore. This can be calculated using the equation  $P_{\text{total}} = \Delta P_2 + P_{\text{CO}_2} = \rho gh$ , where  $\rho$  represents the density of the liquid and  $g$  is the gravitational acceleration. Even in the limiting state where the pressure of  $\text{CO}_2$  above the liquid surface ( $P_{\text{CO}_2}$ ) is zero, the liquid column height ( $h$ ) still needs to reach  $\sim 440$  m to balance  $\Delta P_2$ . This value of  $h$  is much greater than the depth of pores in the CHS shell. Consequently, water can pass through the pores entirely and enter the interior of the hollow space.

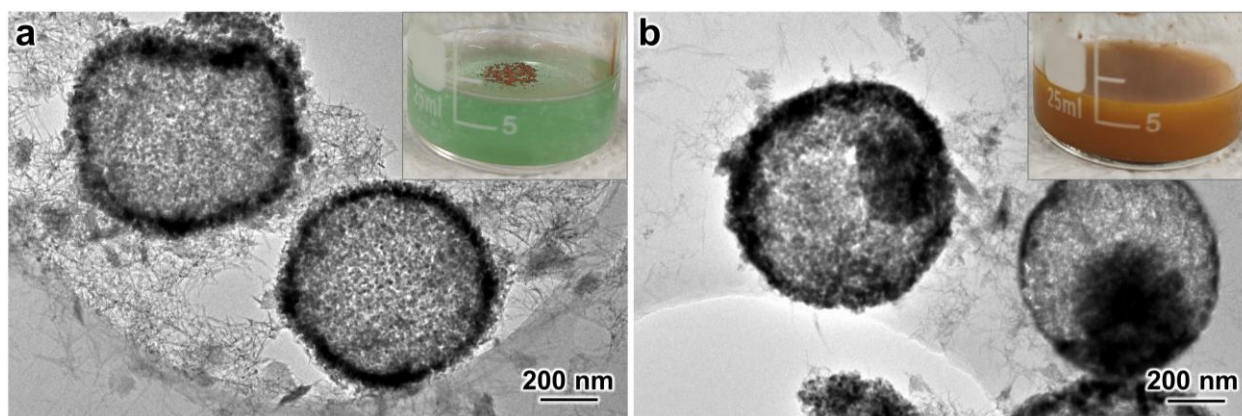

**Fig. S17**  $\text{Cu}(\text{OH})_2$  probe experiments. (a, b) TEM images for O-CHS and CHS after  $\text{Cu}(\text{OH})_2$  probe experiment, respectively. Corresponding insets in [Fig.s S17a](#) and [S17b](#) are the photographs containing O-CHS and CHS after the addition of NaOH solution, respectively. As shown in the inset, the formed  $\text{Cu}(\text{OH})_2$  precipitate is visibly separated from O-CHS. Conversely, in the case of CHS, the  $\text{Cu}(\text{OH})_2$  precipitate forms a homogeneous whole with CHS.

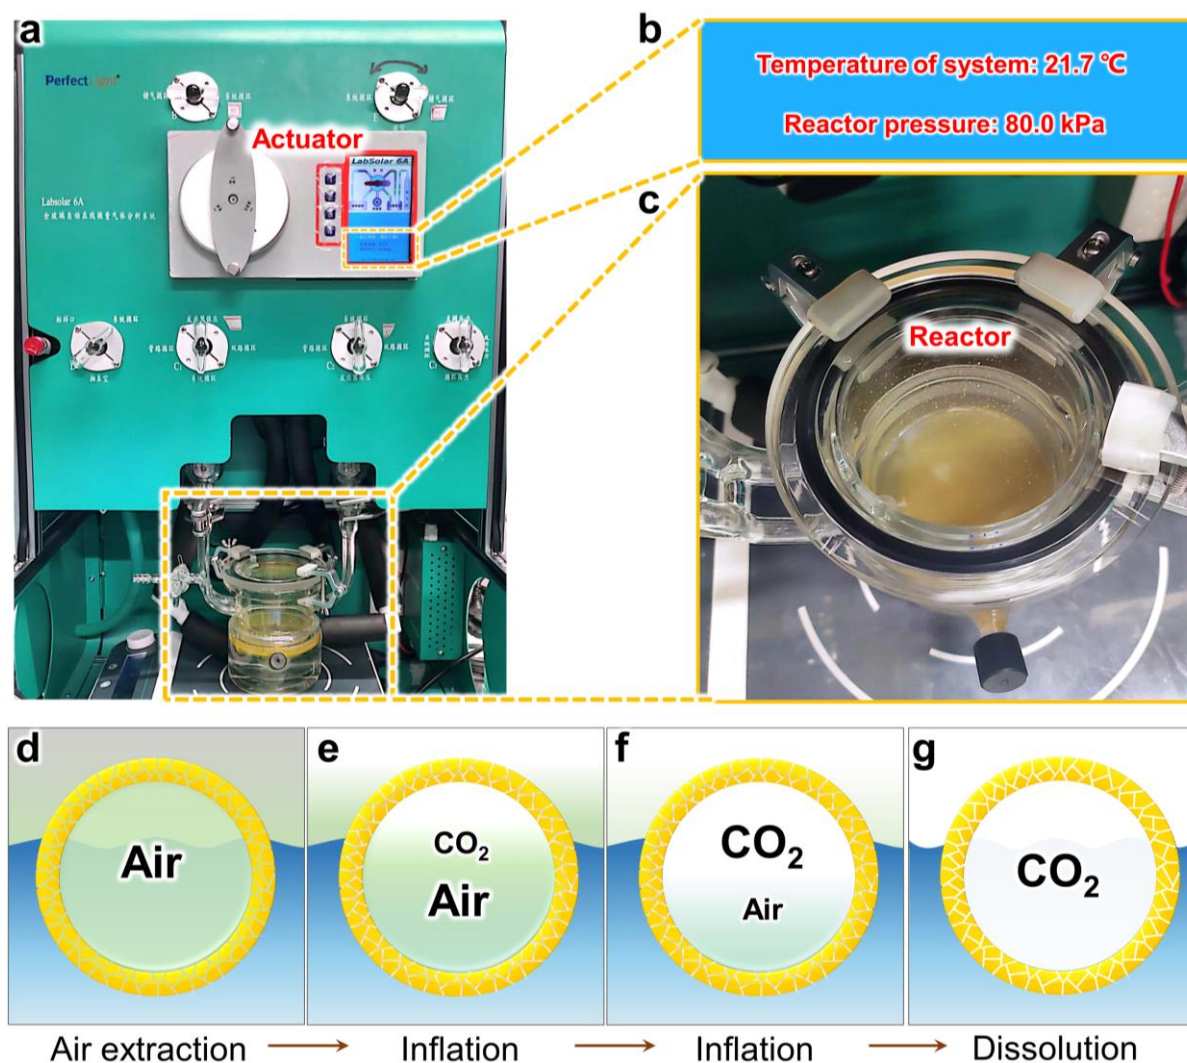

**Fig. S18** Pre-treatment process before the CO<sub>2</sub> photoreduction test. (a) Device used. (b) Enlarged view of the temperature and pressure displayed on the Labsolar 6A actuator. The actuator can display the real-time CO<sub>2</sub> pressure in the gas phase of the system and the temperature of the connected Labsolar 6A. (c) Reactor used in the tests. It can be seen that the superhydrophobic catalyst is floating on the aqueous solution. (d to g) Schematics of the variations in gas composition within the hollow space of O-CHS during the extraction-inflation and CO<sub>2</sub> dissolution processes. The color scheme employed in the schematic representation is as follows: water is depicted in blue, O-CHS in yellow, vacuum in gray, residual air in green, and inflated CO<sub>2</sub> in white. Gradient colors are utilized to illustrate the blending of corresponding states. Prior to commencing the overall PCRR, it is necessary to repeatedly evacuate and inflate the reaction system to minimize the presence of air as much as possible. O-CHS floats on the aqueous solution, gaseous CO<sub>2</sub> above the liquid surface will enter the hollow space through the mesopores it contacts during the inflation process. Consequently, CO<sub>2</sub> gradually displaces the residual air present within the hollow space of O-CHS. After the final inflation to 80 kPa, CO<sub>2</sub> will gradually reach the dissolution equilibrium, and the hollow space of O-CHS will be filled with CO<sub>2</sub>.

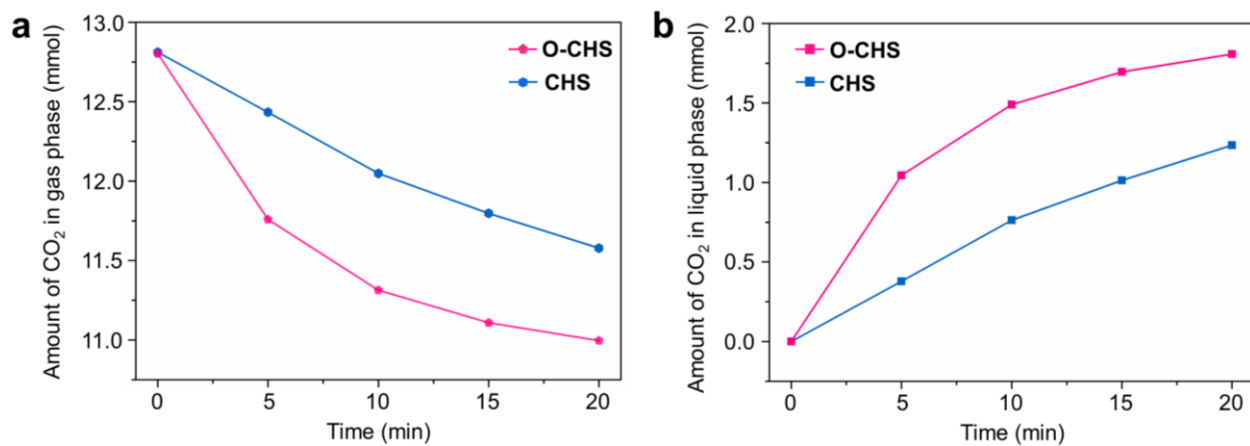

**Fig. S19** CO<sub>2</sub> dissolution rate. (a) Changes of relative amounts of CO<sub>2</sub> in the gas phase in the CO<sub>2</sub> photoreduction test system with the dissolution time over O-CHS and CHS. (b) Changes of relative amounts of CO<sub>2</sub> in the liquid phase in the CO<sub>2</sub> photoreduction test system with the dissolution time over O-CHS and CHS.

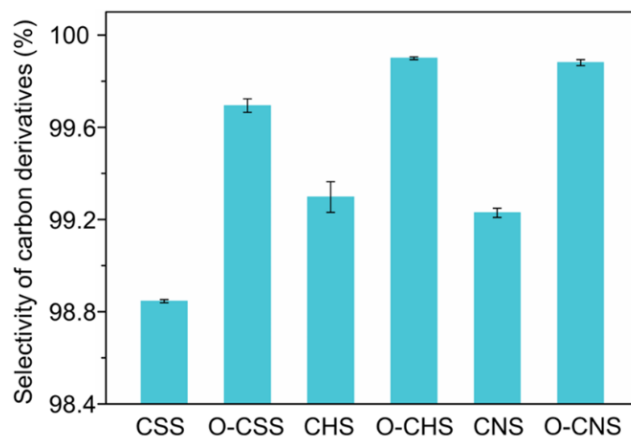

**Fig. S20** Selectivity of carbon derivatives. Selectivities of the sum of methanol and ethanol generated over CSS, O-CSS, CHS, O-CHS, CNS, and O-CNS.

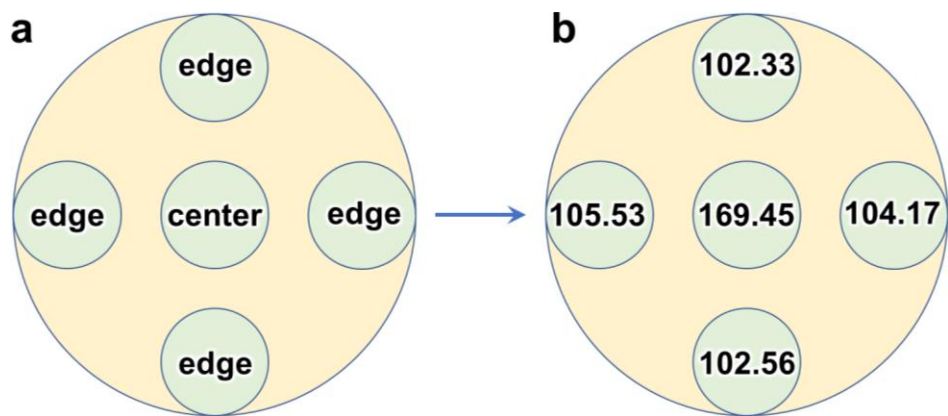

**Fig. S21** Light intensity test. (a) Five different test positions. (b) Corresponding test values.

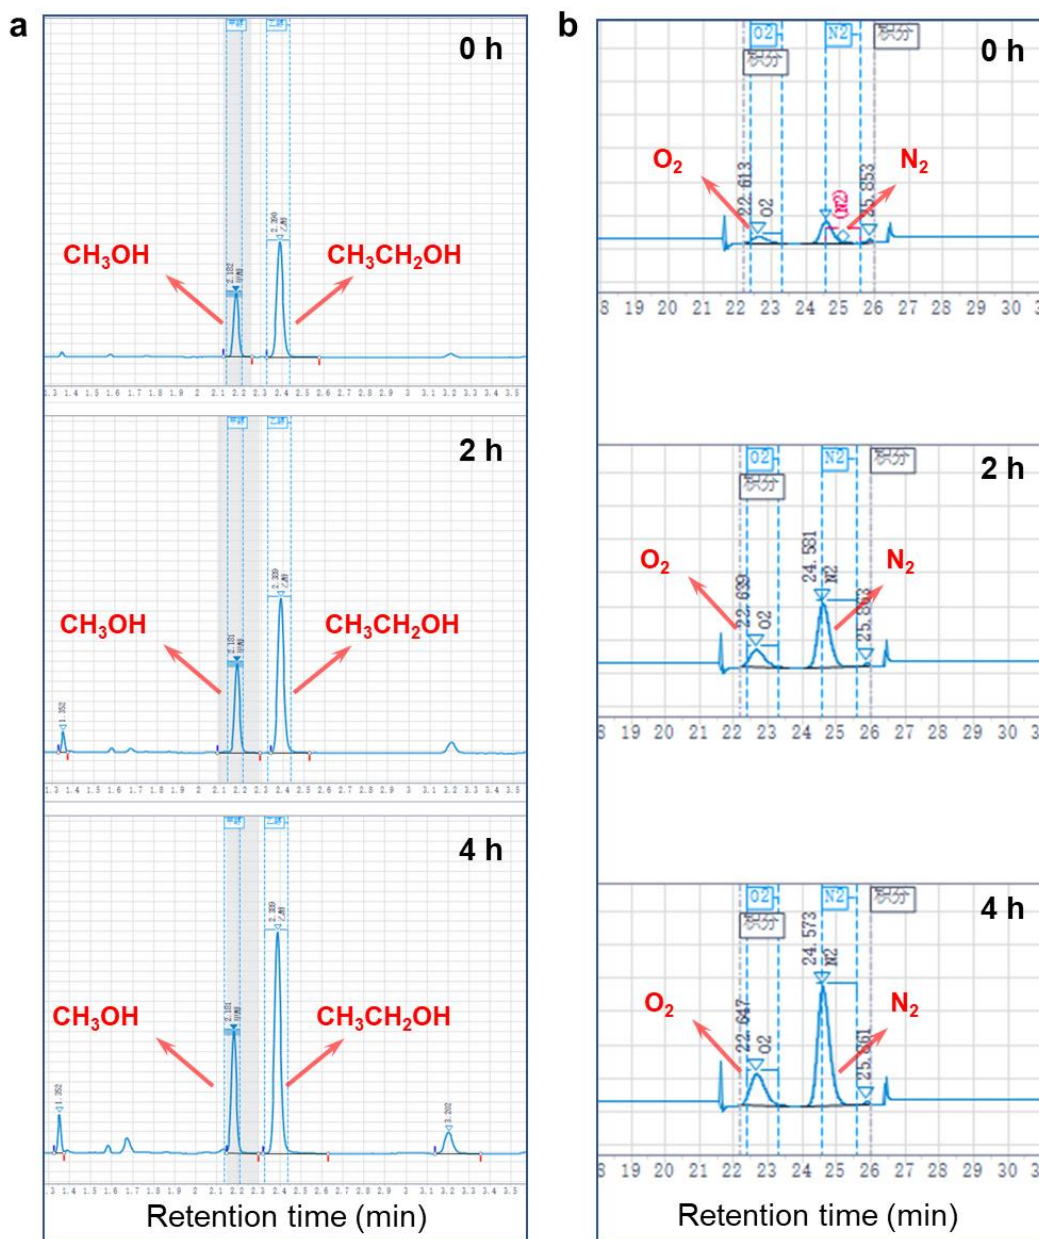

**Fig. S22** Original data obtained from gas chromatography (GC). (a, b) Original data of methanol and ethanol, and  $\text{O}_2$  generation over O-CHS detected by GC, respectively. The intensity of characteristic peaks corresponding to methanol, ethanol, and  $\text{O}_2$  exhibits a clear increase as the reaction time progressed.

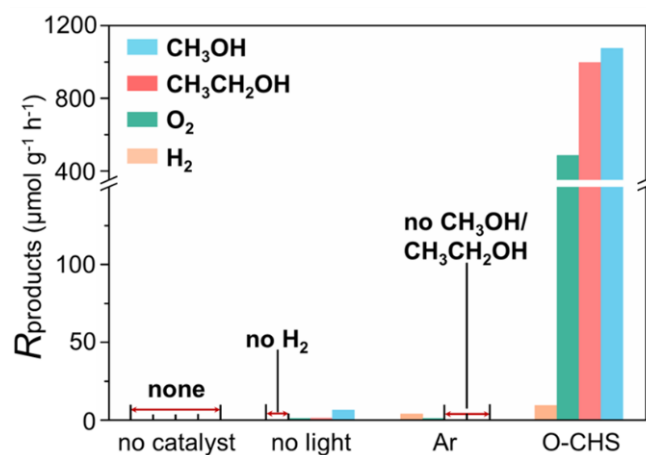

**Fig. S23** Control experiments. Several control experiments were conducted to ensure that obtained products originated from the overall PCRR. Firstly, a test was performed using CO<sub>2</sub> and H<sub>2</sub>O as reactants, but without the presence of a photocatalyst. In this case, no carbon derivatives were detected, indicating that the overall PCRR could not occur in the absence of the photocatalyst. When the test was performed with the catalyst and CO<sub>2</sub>, but without Xe lamp irradiation, only very small amounts of carbon derivatives were obtained, which may result from natural light-induced PCRR. Additionally, when the reactor was vacuumed and purged Ar instead of CO<sub>2</sub>, no carbon derivatives were detected under light irradiation in the presence of water and the catalyst, demonstrating that the carbon source for ethanol and methanol production in the overall PCRR was CO<sub>2</sub>.



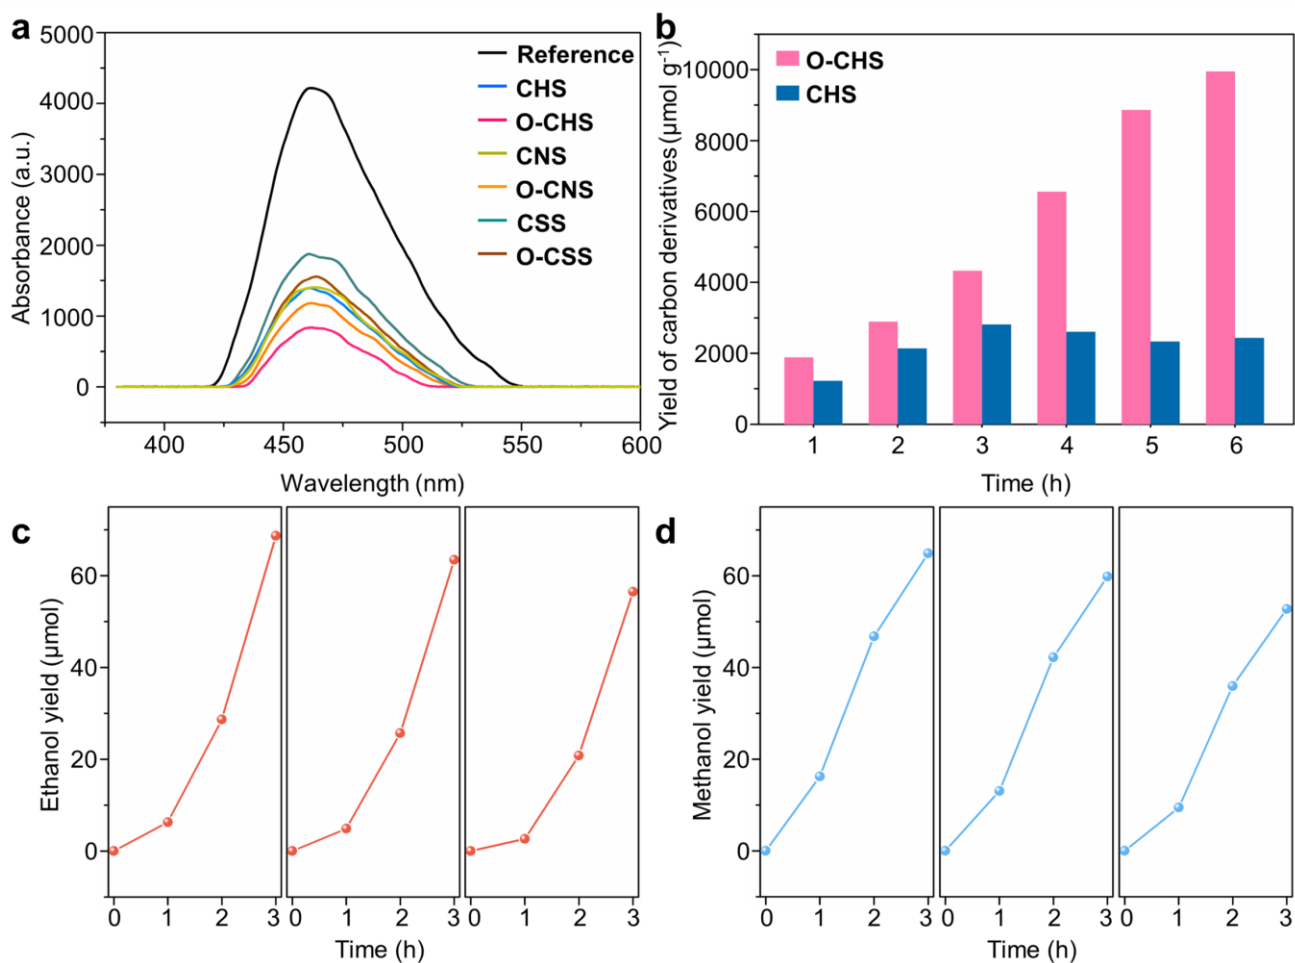

**Fig. S24** Supplemental overall PCRR performance. (a) PL spectra of the scopoletin assay of the reaction solution after the overall PCRR using different catalysts. As the amount of H<sub>2</sub>O<sub>2</sub> in the reaction solution was low, a sensitive chemiluminescence detection method by scopoletin assay was performed. The fluorescent scopoletin could be oxidized by H<sub>2</sub>O<sub>2</sub> in the presence of horseradish peroxidase, leading to the loss of its fluorescence. Thus, a higher intensity of the emission peak for scopoletin at 463 nm in the PL spectra indicates a lower concentration of H<sub>2</sub>O<sub>2</sub> in the reaction solution, and vice versa. By comparing the results obtained from the reference (experiment without reaction solution) and various photocatalysts, it can be inferred that a small amount of H<sub>2</sub>O<sub>2</sub> is generated over each photocatalyst. (b) Yields of carbon derivatives on O-CHS and CHS as a function of irradiation time. (c) Activity recycle tests of photocatalytic CO<sub>2</sub> to ethanol for O-CHS. (d) Activity recycle test of photocatalytic CO<sub>2</sub> to methanol for O-CHS.

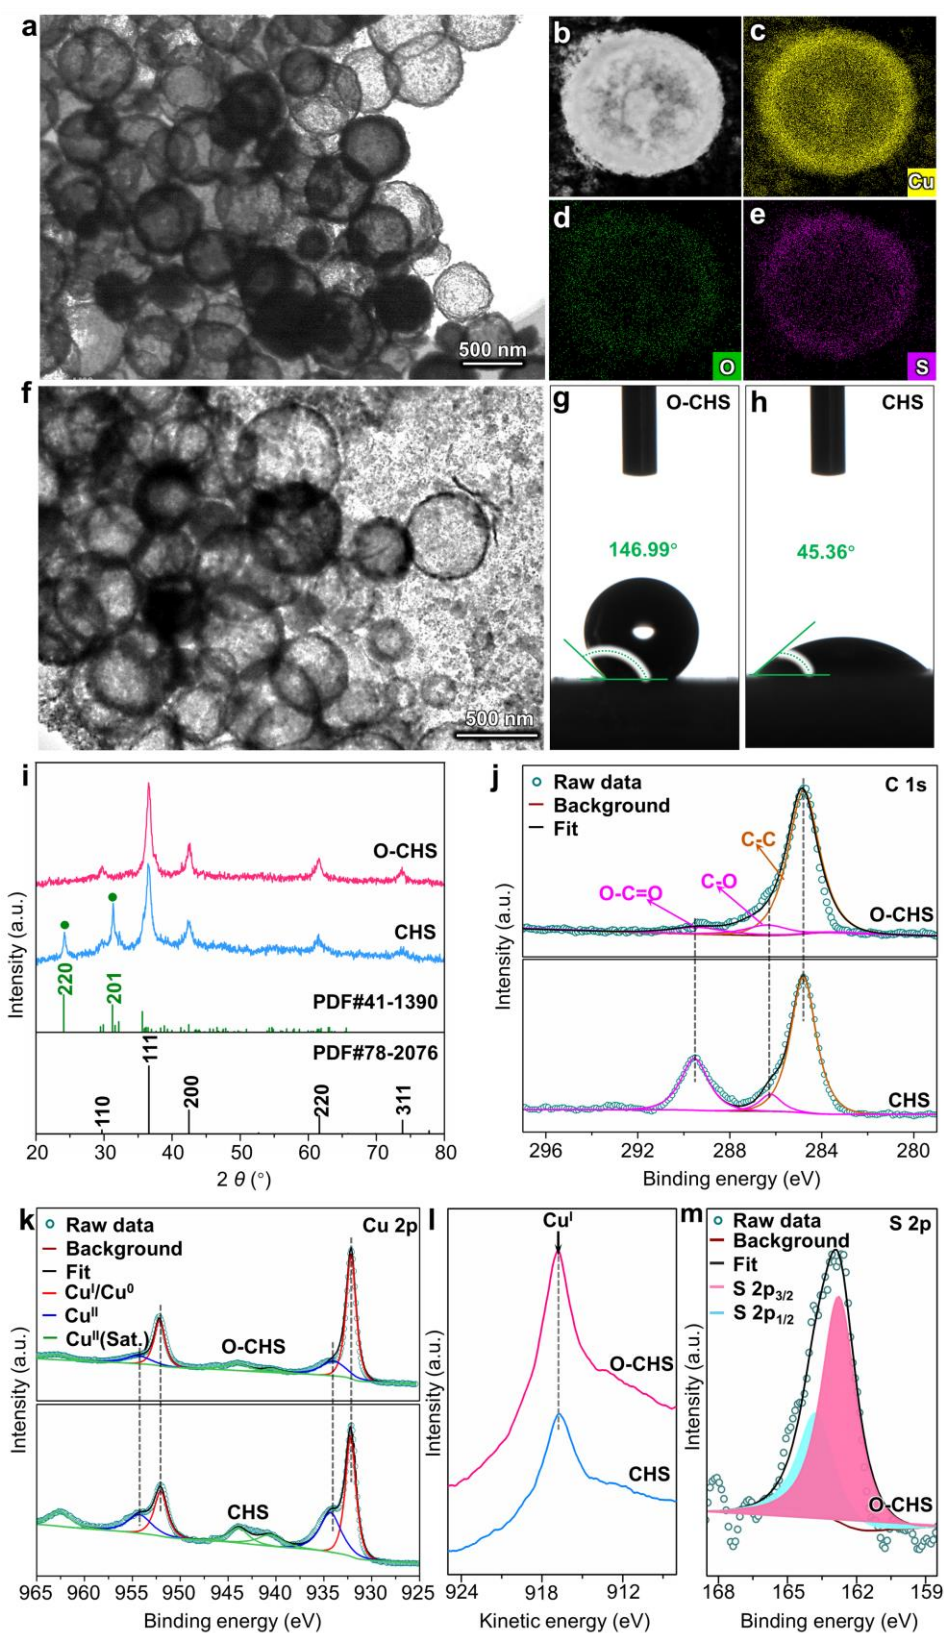

**Fig. S25** Characterizations of O-CHS and CHS after reaction. (a) TEM image of O-CHS. (b) HAADF-STEM image of O-CHS. (c - e) EDS mapping images of Cu, O, and S for O-CHS, respectively. (f) TEM image of CHS. (g, h) WCAs of O-CHS and CHS, respectively. (i) XRD patterns, (j) C 1s XPS spectra, (k) Cu 2p XPS spectra, and (l) Cu LMM Auger spectra of O-CHS and CHS. (m) High-resolution S 2p XPS spectra of O-CHS. The TEM image of the spent O-CHS illustrates that there is no significant change in the hollow structure after 6 h of reaction (Fig. S25a). The HAADF-STEM image of O-CHS also shows the obvious hollow sphere structure for O-CHS after reaction (Fig. S25b). EDS mapping images reveal that S is still evenly distributed on the surface of O-CHS, indicating the stable interaction between DDT and Cu<sub>2</sub>O on the surface of O-CHS (Fig. S25c-S25e). However, the TEM

image of spent CHS displays that there are many fragmentations after 6 h of reaction, indicating the collapse of the hollow structure for CHS (Fig. S25f). The WCAs of spent O-CHS and CHS are measured to be  $146.99^\circ$  and  $45.36^\circ$ , respectively, which are similar to the corresponding WCAs of O-CHS and CHS before reaction (Figs. S25g and S25h). This further suggests the hydrophobic stability of O-CHS during the overall PCRR. Additionally, XRD and XPS measurements are adopted to detect the structural changes of O-CHS and CHS after reaction. It can be seen that there is no change in the XRD pattern of the spent O-CHS (Fig. S25i). However, the XRD pattern of the spent CHS exhibits additional characteristic diffraction peaks at  $24.10^\circ$  and  $31.24^\circ$ , which are assigned to the (220) and (201) planes of basic copper carbonate ( $\text{Cu}_2(\text{OH})_2\text{CO}_3$ ), respectively (JCPDS Card No. 41-1390)<sup>13</sup>. The presence of  $\text{Cu}_2(\text{OH})_2\text{CO}_3$  in the spent CHS is further confirmed by the C 1s XPS spectra (Fig. S25j). The sharp peak at 284.8 eV can be attributed to carbon-containing contamination used for spectral calibration. The peaks at 286.2 and 289.5 eV correspond to O-C=O and C-O, respectively, demonstrating the formation of  $\text{Cu}_2(\text{OH})_2\text{CO}_3$ .<sup>14</sup> This transformation could be owing to the reoxidation of reduced copper species generated during the overall PCRR, which can occur easily when exposed to air.<sup>15, 16</sup> The greater  $\text{Cu}_2(\text{OH})_2\text{CO}_3$  signal observed for CHS indicates the more reduced copper species formed. Additionally, the main compositions of the spent O-CHS and CHS can still be identified as  $\text{Cu}_2\text{O}$ , as observed by combining the Cu 2p XPS spectra and the Cu LMM Auger spectra (Figs. S25k and S25l). However, the presence of high-intensity shake-up satellites at approximately 940.5, 943.9, and 962.7 eV in Cu 2p XPS spectra, assigned to CuO in CHS, also imply the more severe occurrence of photocorrosion in CHS.<sup>17</sup> In contrast, O-CHS shows better stability. This could be attributed to the protective barrier provided by its superhydrophobic surface, effectively repelling  $\text{H}_2\text{O}$  from the surface of O-CHS. Thus, the electron-mediated photocorrosion involving  $\text{H}_2\text{O}$  of  $\text{Cu}_2\text{O}$  could be weakened.<sup>18, 19</sup> Moreover, due to the faster reaction rate of O-CHS to consume more photogenerated holes, hole-mediated photocorrosion could also be inhibited.<sup>20, 21</sup> Additionally, in order to further verify the stability of DDT adsorbed on the surface of O-CHS, S 2p XPS test for O-CHS after reaction was conducted to detect the change in the surface chemical states of S. It can be seen that the binding energies for the S 2p<sub>3/2</sub> core level on O-CHS still exhibit a strong peak at 162.45 eV, falling well within the expected range for a surface thiolate species (RS-Cu). Thus, DDT is still chemically adsorbed on the surface of O-CHS, providing hydrophobicity for O-CHS.

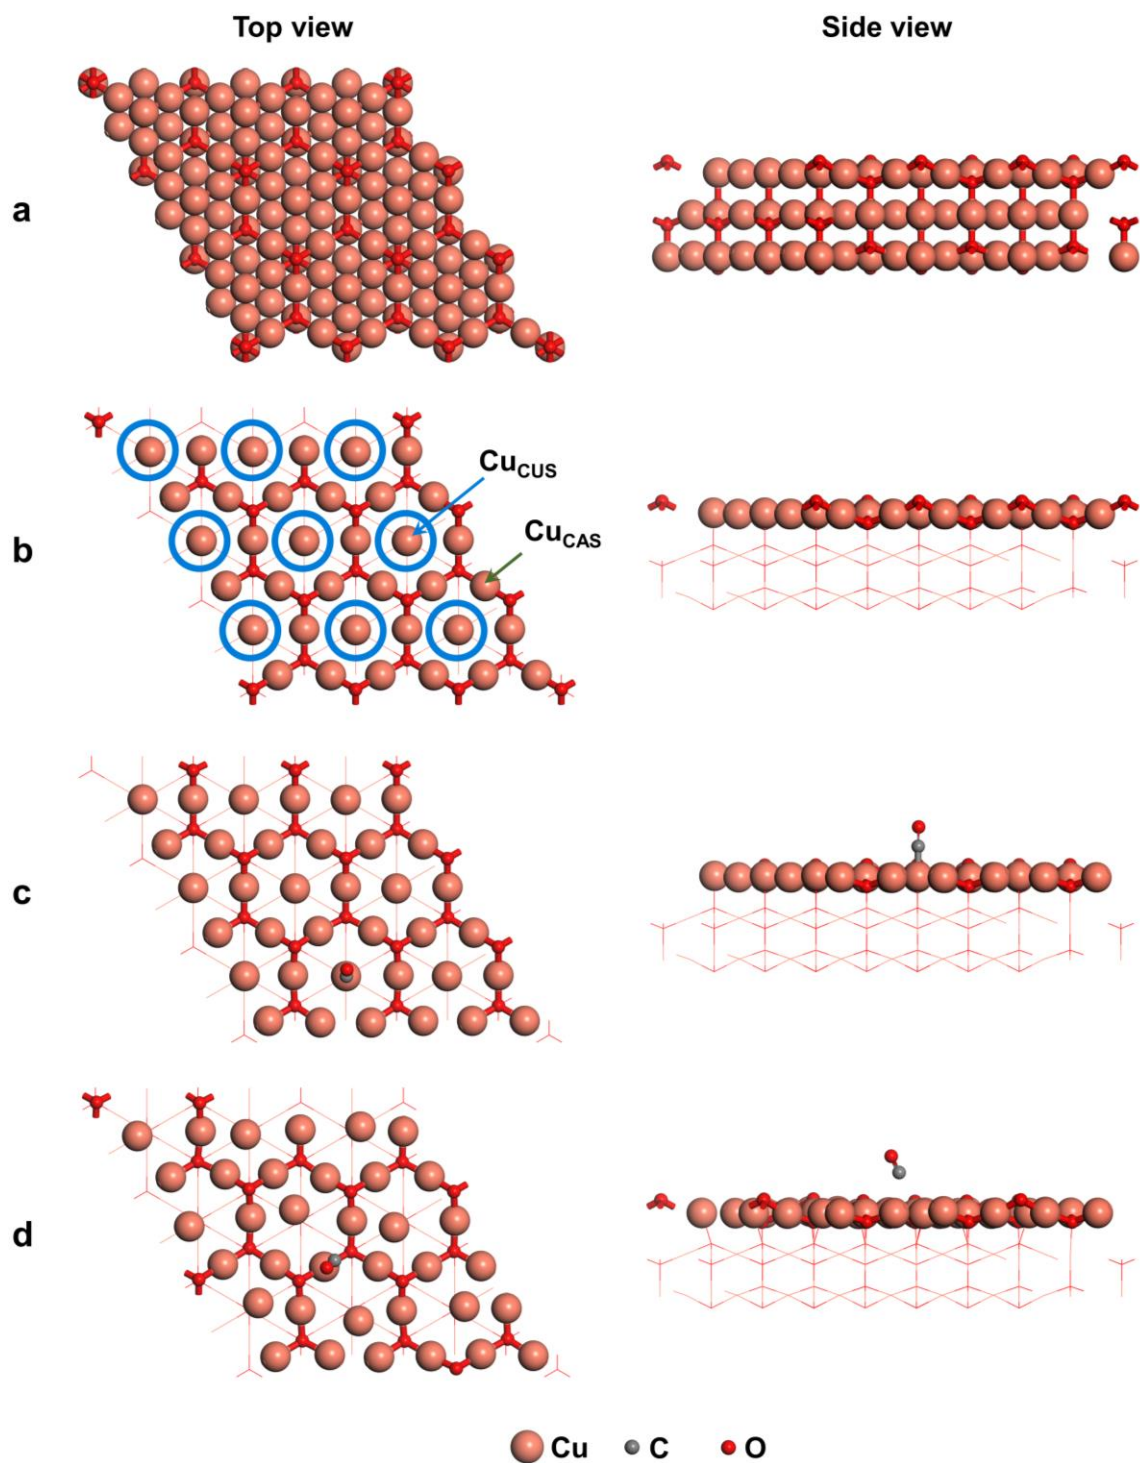

**Fig. S26** Top and side views of different configurations. (a) Slab model of the ideal Cu<sub>2</sub>O (111) surface. (b) Two different adsorption sites of Cu on Cu<sub>2</sub>O (111) surface. (c) Slab model with CO adsorbed on the site of Cu<sub>CUS</sub>. (d) Slab model with CO adsorbed on the site of Cu<sub>CAS</sub>. The brown, gray, and red balls represent Cu, C, and O atoms, respectively. The Cu<sub>2</sub>O (111) surface is depicted as a periodic (3×3) slab, consisting of three layers (Fig. S26a). To clearly illustrate the different coordination situations of Cu atoms, the ball-stick model is used for the first layer, while the remaining two layers are represented by line segments. As shown in Fig. S26b, Cu<sub>CUS</sub> represents the coordinatively unsaturated surface Cu atom marked with blue circles, and the other Cu atoms are coordinatively saturated Cu atoms (Cu<sub>CAS</sub>). CO can form a stable bond with Cu<sub>CUS</sub> (Fig. S26c), whereas this is not the case for Cu<sub>CAS</sub> (Fig. S26d). Thus, Cu<sub>CUS</sub> is selected as the active site for the DFT calculation and there are a total of nine Cu<sub>CUS</sub> sites on the Cu<sub>2</sub>O (111) slab (marked with blue circles in Fig. S26b).

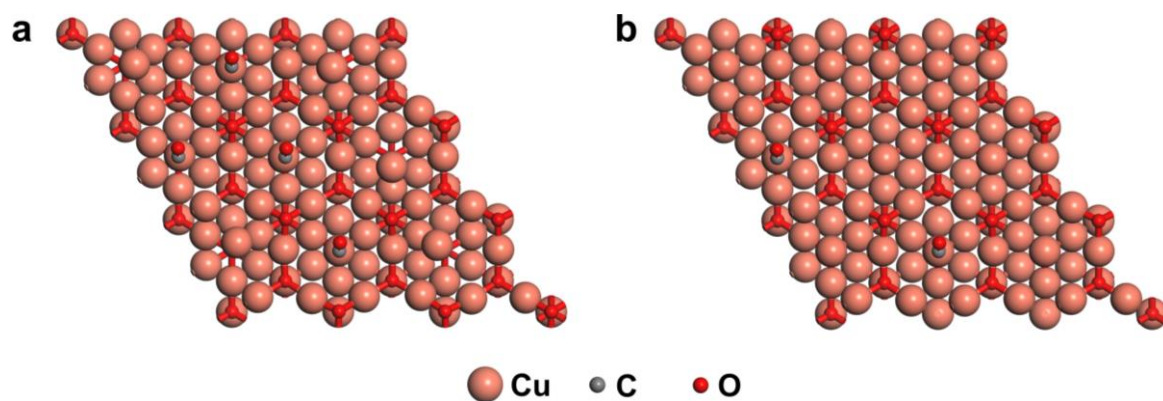

**Fig. S27 Configurations at different \*CO coverages.** (a) High \*CO coverage of  $\text{Cu}_2\text{O}$ . (b) Low \*CO coverage of  $\text{Cu}_2\text{O}$ . The brown, gray, and red balls represent Cu, C, and O atoms, respectively. Four CO molecules are placed on  $\text{Cu}_{\text{CUS}}$  sites of the  $\text{Cu}_2\text{O}$  model to simulate the high \*CO coverage of O-CHS. In contrast, a low \*CO coverage of CHS with only two CO molecules placed on  $\text{Cu}_{\text{CUS}}$  sites is adopted. The Gibbs free energy changes ( $\Delta G$ ) for CO adsorption on  $\text{Cu}_{\text{CUS}}$  at different \*CO coverages are then calculated. The results of -2.450 and -2.398 eV for high and low \*CO coverages, respectively, illustrate the stable binding of CO with  $\text{Cu}_{\text{CUS}}$  (Table S3).

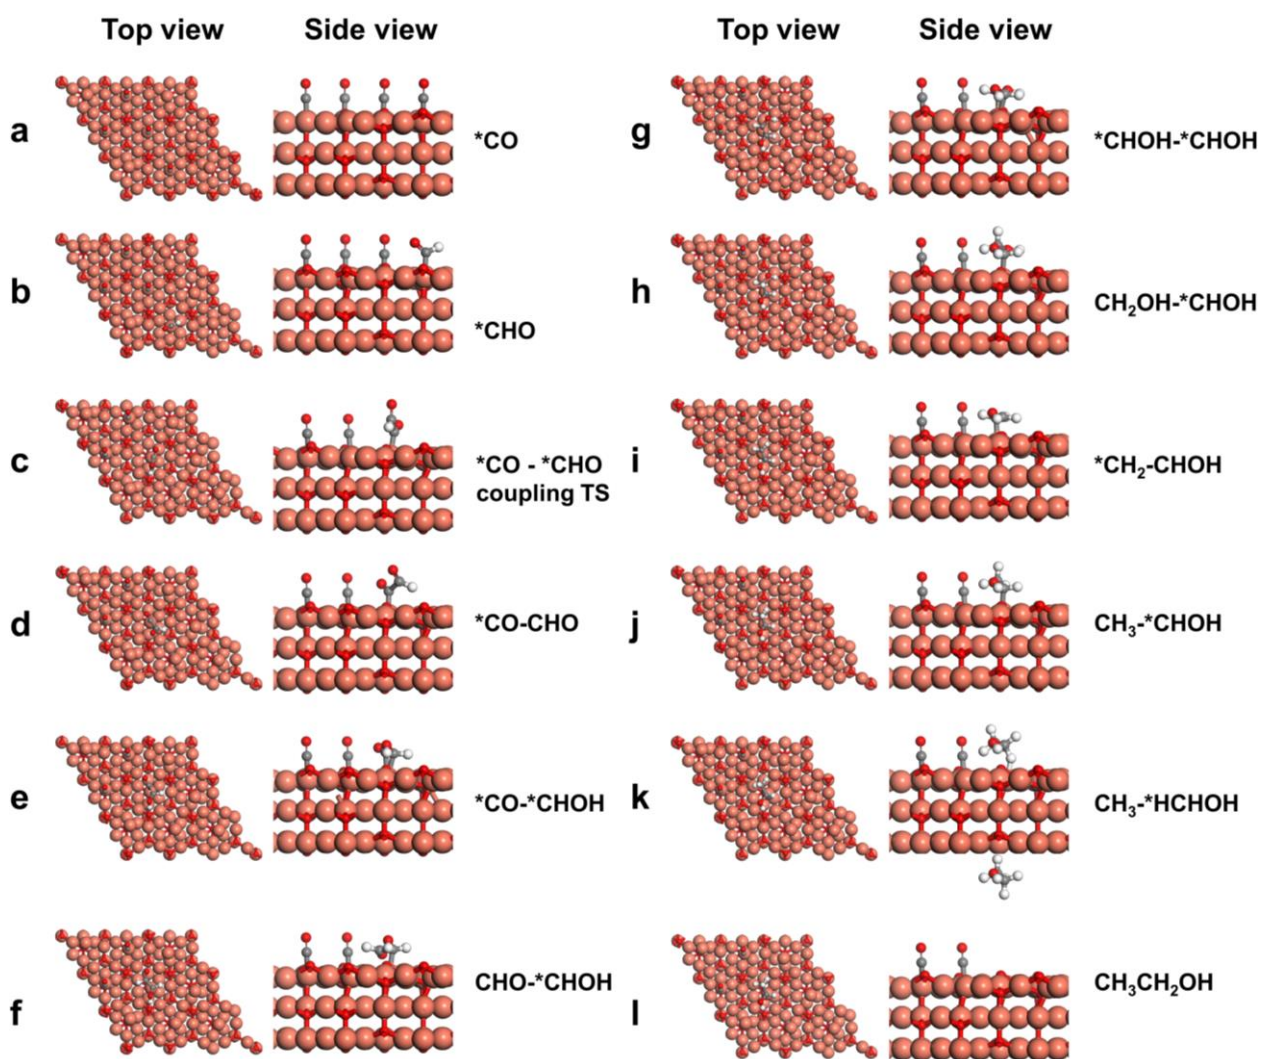

**Fig. S28** Top and side views of different configurations for CO<sub>2</sub>-to-CH<sub>3</sub>CH<sub>2</sub>OH conversion at high \*CO coverage. (a to l) Top and side views of optimized adsorption configurations for main reaction intermediates during the overall PCRR to ethanol on Cu<sub>2</sub>O (111) surface at high \*CO coverage. The brown, gray, red, and white balls represent Cu, C, O, and H atoms, respectively. TS means transition state of C-C coupling. \* represents surface adsorption.

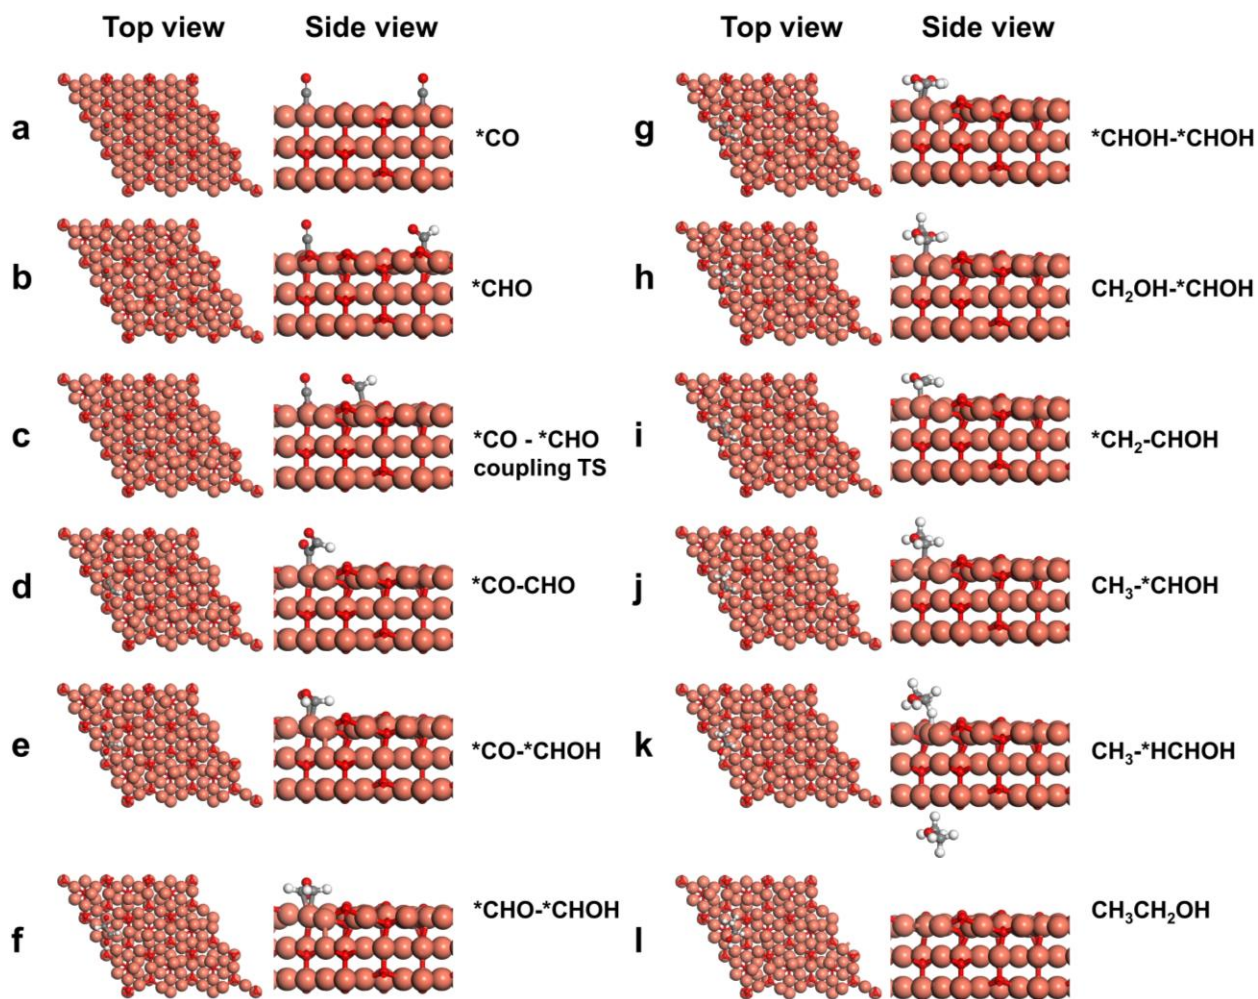

**Fig. S29** Top and side views of different configurations for CO<sub>2</sub>-to-CH<sub>3</sub>CH<sub>2</sub>OH conversion at low \*CO coverage. (a to l) Top and side views of optimized adsorption configurations for main reaction intermediates during the overall PCRR to ethanol on Cu<sub>2</sub>O (111) surface at low \*CO coverage. The brown, gray, red, and white balls represent Cu, C, O, and H atoms, respectively. TS means transition state of C-C coupling. \* represents surface adsorption.

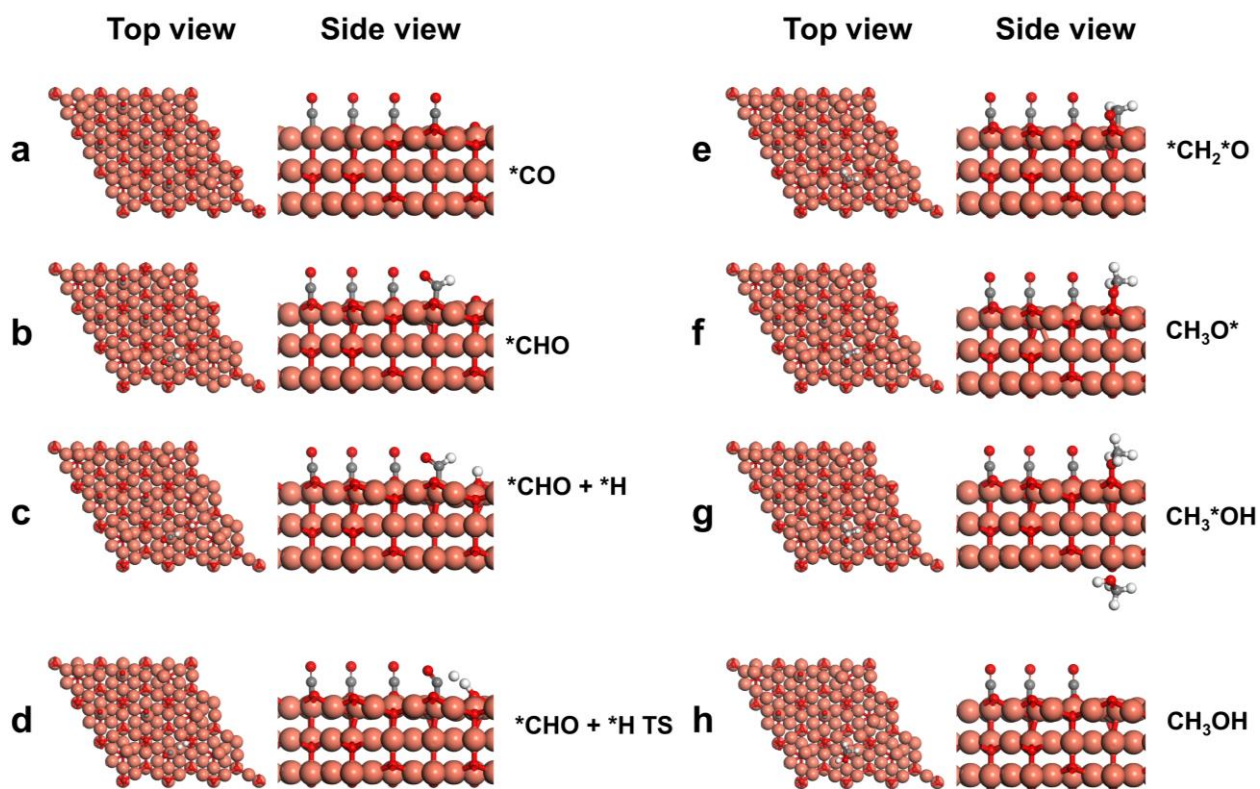

**Fig. S30** Top and side views of different configurations for CO<sub>2</sub>-to-CH<sub>3</sub>OH conversion at high \*CO coverage. (a to h) Top and side views of optimized adsorption configurations for main reaction intermediates during the overall PCRR to methanol on Cu<sub>2</sub>O (111) surface at high \*CO coverage. The brown, gray, red, and white balls represent Cu, C, O, and H atoms, respectively. TS means the transition state from \*CHO to \*CH<sub>2</sub>O. \* represents surface adsorption.



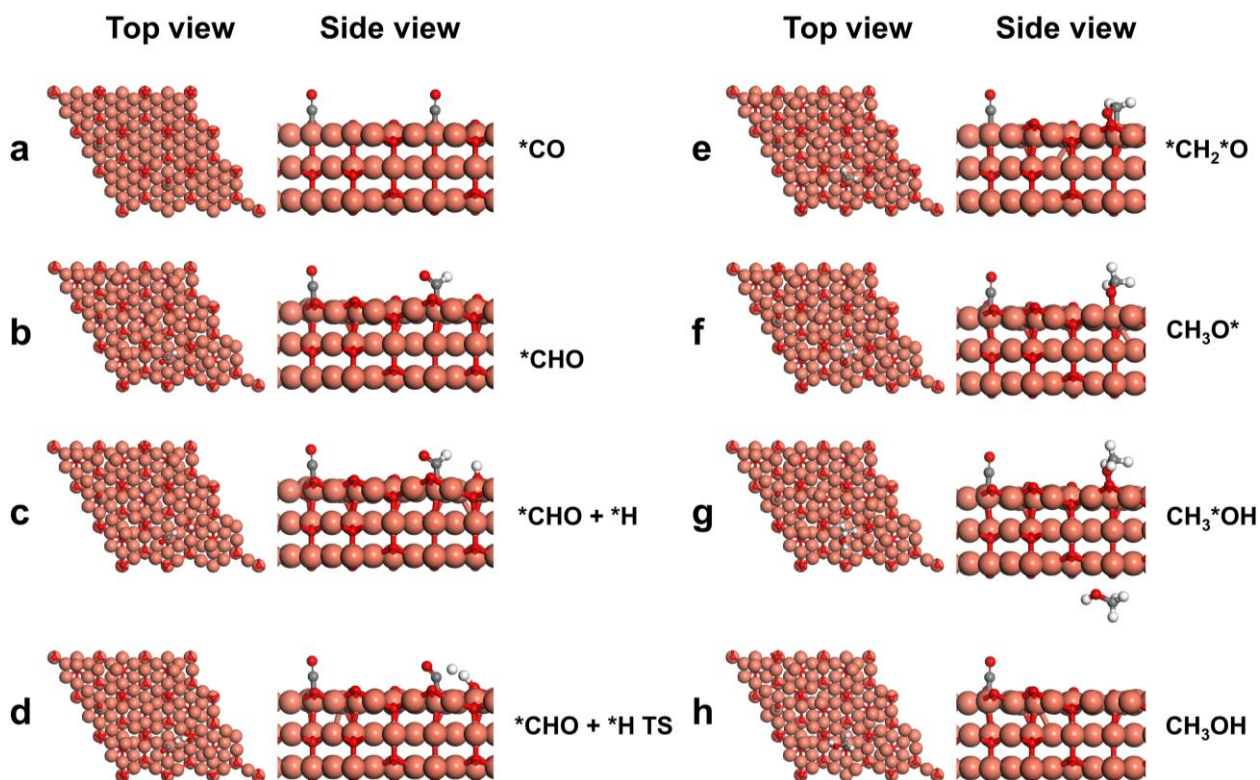

**Fig. S31** Top and side views of different configurations for  $CO_2$ -to- $CH_3OH$  conversion at low  $*CO$  coverage. (a to h) Top and side views of adsorption configurations of main reaction intermediates during the overall PCRR to methanol on  $Cu_2O$  (111) surface at low  $*CO$  coverage. The brown, gray, red, and white balls represent Cu, C, O, and H atoms, respectively. TS means the transition state from  $*CHO$  to  $*CH_2O$ .  $*$  represents surface adsorption.

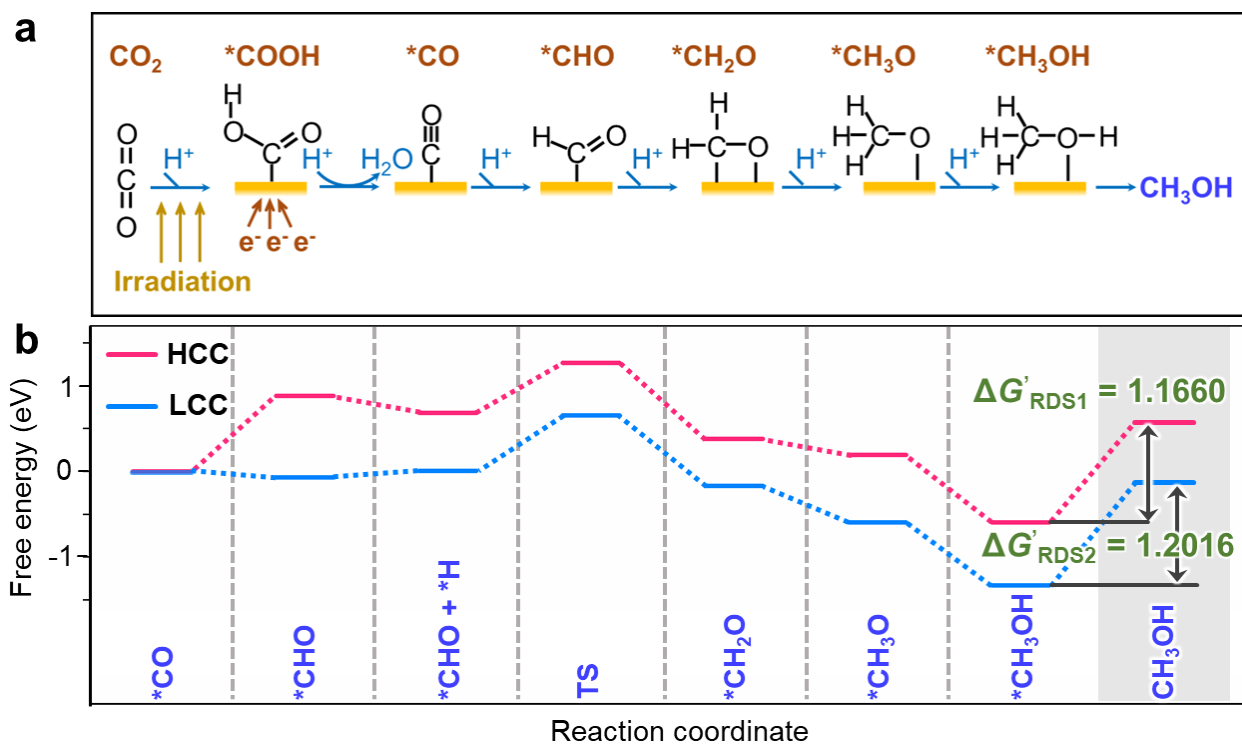

**Fig. S32** Reaction mechanism of methanol formation. (a) Possible CO<sub>2</sub>-to-methanol reaction pathway over the designed catalyst. (b) Gibbs free energy diagram of the methanol pathway on Cu<sub>2</sub>O (111) surface at high \*CO coverage (HCC) and low \*CO coverage (LCC).  $\Delta G'_{RDS}$  means the Gibbs free energy change for the rate-determining step of methanol formation. TS means the transition state from \*CHO to \*CH<sub>2</sub>O. The \*CH<sub>3</sub>OH desorption step exhibits the highest energy barrier (denoted as  $\Delta G'_{RDS}$ ), making it the rate-determining step (RDS) for methanol formation. In comparison to the LCC state, the HCC state exhibits a lower  $\Delta G'_{RDS1}$  with 1.1660 eV, which indicates that the enrichment of CO<sub>2</sub> on the catalyst surface also benefits methanol generation.

**Table S1** Typical photocatalytic systems for CO<sub>2</sub> reduction to ethanol

| Photocatalyst                                                                                          | Formation rate ( $\mu\text{mol g}^{-1} \text{h}^{-1}$ ) |               | Light source,<br>reaction mode                       | Ref.             |
|--------------------------------------------------------------------------------------------------------|---------------------------------------------------------|---------------|------------------------------------------------------|------------------|
|                                                                                                        | Methanol                                                | Ethanol       |                                                      |                  |
| <b>O-CHS</b>                                                                                           | <b>1073.04</b>                                          | <b>996.18</b> | <b>Xe lamp (&gt; 420 nm), Solid-liquid</b>           | <b>This work</b> |
| Red phosphorus/Bi <sub>2</sub> MoO <sub>6</sub>                                                        | 30.2                                                    | 51.8          | Xe lamp (> 400 nm), Solid-liquid                     | 22               |
| u-g-C <sub>3</sub> N <sub>4</sub>                                                                      | 6.3                                                     | 4.51          | Xe lamp (> 420 nm), Solid-liquid                     | 23               |
| m-g-C <sub>3</sub> N <sub>4</sub>                                                                      | -                                                       | 3.64          | Xe lamp (> 420 nm), Solid-liquid                     | 23               |
| Monoclinic BiVO <sub>4</sub>                                                                           | -                                                       | 101           | Xe lamp (> 400 nm), Solid-liquid                     | 24               |
| Tetragonal BiVO <sub>4</sub>                                                                           | -                                                       | 5.6           | Xe lamp (> 400 nm), Solid-liquid                     | 24               |
| 1 wt% Co-doped TiO <sub>2</sub>                                                                        | 26                                                      | 18            | Halogen lamp (> 380 nm), Solid-vapor                 | 25               |
| Cu <sup>2+</sup> -doped TiO <sub>2</sub>                                                               | 24                                                      | 47            | 365 nm LED lamp, Solid-vapor                         | 26               |
| TiO <sub>2</sub>                                                                                       | 6.7                                                     | 6.3           | 365 nm LED lamp, Solid-vapor                         | 26               |
| GO-TiO <sub>2</sub>                                                                                    | 12                                                      | 145           | Hg lamp, Solid-liquid                                | 27               |
| Rh nanowires/TiO <sub>2</sub>                                                                          | -                                                       | 12.1          | Xe lamp (< 400 nm), Solid-vapor                      | 28               |
| TiO <sub>2</sub> -Pd nanowires                                                                         | -                                                       | 13            | Xe lamp (< 400 nm), Solid-vapor                      | 28               |
| NiO/Na <sub>1-x</sub> La <sub>x</sub> TaO <sub>3+x</sub>                                               | 60                                                      | 19            | Hg lamp (300-700 nm), Solid-liquid                   | 29               |
| MWCNTs/TiO <sub>2</sub> (anatase)                                                                      | -                                                       | 29.9          | UV lamp (365 nm), Solid-vapor                        | 30               |
| Cu <sub>2</sub> O/ml-G                                                                                 | -                                                       | 545           | UV lamp (254 nm), Solid-liquid                       | 31               |
| Pt-TaON                                                                                                | -                                                       | 2.03          | Xe lamp (> 420 nm), Solid-liquid                     | 32               |
| TiO <sub>2</sub> /Ni(OH) <sub>2</sub>                                                                  | 0.58                                                    | 0.37          | Xe lamp (Simulated sunlight), Solid-vapor            | 33               |
| 1.5 wt% Ni <sup>2+</sup> -TiO <sub>2</sub>                                                             | 5.58                                                    | 13.2          | Halogen and mercury lamp, Solid-vapor                | 34               |
| 5% GQDs/V-TiO <sub>2</sub>                                                                             | 22.5                                                    | 13.5          | Xe lamp (Simulated sunlight), Solid-liquid           | 35               |
| 23.2% AgBr/TiO <sub>2</sub>                                                                            | 77.87                                                   | 13.28         | Xe lamp (> 420 nm), Solid-liquid                     | 36               |
| ZnO/g-C <sub>3</sub> N <sub>4</sub>                                                                    | 19.0                                                    | 2.5           | Xe lamp (Simulated sunlight), Solid-liquid           | 37               |
| Ag <sub>3</sub> PO <sub>4</sub> /g-C <sub>3</sub> N <sub>4</sub>                                       | -                                                       | 1.3           | Xe lamp (Simulated sunlight), Solid-liquid           | 38               |
| 5.8wt% Pd/g-C <sub>3</sub> N <sub>4</sub>                                                              | -                                                       | 2.18          | Xe lamp (> 420 nm), Solid-vapor                      | 39               |
| Cu/Pt-HCa <sub>2</sub> Ta <sub>3</sub> O <sub>10</sub>                                                 | 7.4                                                     | 113.2         | Xe lamp (Simulated sunlight), Solid-vapor            | 40               |
| BiVO <sub>4</sub> /RGO                                                                                 | -                                                       | 5.15          | Xe lamp (Simulated sunlight), Solid-liquid           | 41               |
| Ag@AgBr/CNT                                                                                            | 17.21                                                   | 2.94          | Xe lamp (> 420 nm), Solid-liquid                     | 42               |
| Red Ag/AgCl                                                                                            | 29.2                                                    | 44.6          | Xe lamp (> 420 nm), Solid-liquid                     | 43               |
| Sr <sub>3</sub> Ti <sub>(2-x-y)</sub> Fe <sub>x</sub> S <sub>y</sub> O <sub>(7-z)</sub> N <sub>z</sub> | 60.1                                                    | 9.9           | Hg lamp (300-700 nm), Solid-liquid                   | 44               |
| Zn <sub>0.8</sub> Cd <sub>0.2</sub> S                                                                  | 2.5                                                     | 6.0           | Xe lamp (> 400 nm), Solid-liquid                     | 45               |
| Pd/Mn-TiO <sub>2</sub>                                                                                 | 0.104                                                   | 5.699         | Xe lamp (UV light), Solid-liquid                     | 46               |
| Na <sub>(1-x)</sub> La <sub>x</sub> TaO <sub>(3+x)</sub>                                               | 35.0                                                    | 3.1           | Hg lamp (300-700 nm), Solid-liquid                   | 47               |
| CoTPP/Na <sub>(1-x)</sub> La <sub>x</sub> TaO <sub>(3+x)</sub>                                         | 36.2                                                    | 21.4          | Hg lamp (300-700 nm), Solid-liquid                   | 47               |
| Cu SAs/UiO-66-NH <sub>2</sub>                                                                          | 5.33                                                    | 4.22          | Xe lamp (400 nm), Solid-liquid                       | 48               |
| Trimodal silica/g-C <sub>3</sub> N <sub>4</sub>                                                        | -                                                       | 90            | Xe lamp ( $\lambda > 420 \text{ nm}$ ), Solid-liquid | 49               |

| Photocatalyst                                         | Formation rate ( $\mu\text{mol g}^{-1} \text{h}^{-1}$ ) |                        | Light source,<br>reaction mode                      | Ref. |
|-------------------------------------------------------|---------------------------------------------------------|------------------------|-----------------------------------------------------|------|
|                                                       | Methanol                                                | Ethanol                |                                                     |      |
| g-C <sub>3</sub> N <sub>4</sub> (Defect)              | 3.85                                                    | 1.98                   | Xe lamp ( $\lambda > 420 \text{ nm}$ ), Solid-vapor | 50   |
| Sn <sub>x</sub> Nb <sub>1-x</sub> O <sub>2</sub>      | 5.25                                                    | 130.36                 | Xe lamp, Solid-vapor                                | 51   |
| SrTiO <sub>3</sub> (La Cr)/Cu @ Ni/TiN                | -                                                       | 21.3                   | Xe lamp, Solid-liquid                               | 52   |
| Cu/Cd <sub>0.5</sub> Zn <sub>0.5</sub> S              | -                                                       | 2.26 $\mu\text{mol/h}$ | Xe lamp, Solid-liquid                               | 6    |
| Cu <sub>2</sub> O/Pt/NH <sub>2</sub> -MIL-125(Ti)     | 144.82                                                  | 239.49                 | Xe lamp (400 nm), Solid-liquid                      | 53   |
| Cu <sub>2</sub> O/g-C <sub>3</sub> N <sub>4</sub>     | -                                                       | 375.66                 | Xe lamp ( $> 420 \text{ nm}$ ), Solid-liquid        | 54   |
| 1.0 wt% AuCu/g-C <sub>3</sub> N <sub>4</sub>          | -                                                       | 211.9                  | Xe lamp ( $> 420 \text{ nm}$ ), Solid-liquid        | 55   |
| Cu <sub>2</sub> O-modified layered BiOI               | 152.26                                                  | 68.49                  | Xe lamp, Solid-liquid                               | 56   |
| 1% CeO <sub>2</sub> /3% CuO/TiO <sub>2</sub>          | -                                                       | 30.5                   | UV lamp (254 nm), Solid-liquid                      | 57   |
| InCu/PCN                                              | -                                                       | 28.5                   | Xe lamp, Solid-liquid                               | 58   |
| Pd <sub>x</sub> In <sub>y</sub> @N <sub>3</sub> -COF  | 24.605                                                  | 8.645                  | Xe lamp (400 nm), Solid-liquid                      | 59   |
| Zn(II)/Cu(I, II)- 1,3,5-<br>benzenetricarboxylic acid | 4470                                                    | 605                    | Xe lamp, Solid-liquid                               | 60   |
| BiOI <sub>x</sub> Cl <sub>y</sub>                     | 130.265                                                 | 33.066                 | Xe lamp, Solid-liquid                               | 61   |

**Table S2** Fitted parameters obtained from decay curves of the samples

| Sample | $\tau_1$ (ns) | $\tau_2$ (ns) | $\tau_3$ (ns) | $\tau_a$ (ns) | $\chi^2$ |
|--------|---------------|---------------|---------------|---------------|----------|
| O-CHS  | 0.53          | 4.52          | 36.77         | 1.97          | 1.28     |
| O-CNS  | 0.55          | 5.03          | 40.68         | 1.85          | 1.22     |
| O-CSS  | 0.48          | 4.69          | 59.76         | 1.49          | 1.25     |

$\tau_1$ ,  $\tau_2$  and  $\tau_3$  represent the lifetime (ns) in the radiative, non-radiative and energy transfer process, respectively.<sup>62</sup>  $\tau_a$  represents the average lifetime (ns) of photogenerated carriers.  $\chi^2$  represents the goodness of fit parameter.

**Table S3** BET surface areas and pore sizes of all samples

| Sample | Surface area ( $\text{cm}^3 \text{g}^{-1}$ ) | Pore size (nm) |
|--------|----------------------------------------------|----------------|
| CHS    | 38.0891                                      | 12.8139        |
| O-CHS  | 35.2125                                      | 11.3167        |
| CSS    | 9.0563                                       | 18.9323        |
| O-CSS  | 8.6979                                       | 17.2529        |
| CNS    | 50.92                                        | 28.447         |
| O-CNS  | 46.95                                        | 26.164         |

**Table S4** Gibbs free energy change ( $\Delta G$ ) of CO adsorption on the Cu<sub>2</sub>O (111) surface at different \*CO coverages

| *CO coverage      | $\Delta G$ (eV) |
|-------------------|-----------------|
| high *CO coverage | -2.450          |
| low *CO coverage  | -2.398          |

**Table S5** Different intermediates potentially formed with different numbers of H<sup>+</sup> transfers for ethanol generation at high \*CO coverage

| Number of H <sup>+</sup> transferred | Intermediate                               | Energy (eV)       |
|--------------------------------------|--------------------------------------------|-------------------|
| 1                                    | <b>CHO</b>                                 | <b>-805.29535</b> |
|                                      | COH                                        | -803.35949        |
|                                      | <b>COCHOH</b>                              | <b>-808.62853</b> |
| 2                                    | COCH <sub>2</sub> O                        | -808.55206        |
|                                      | COHCHO                                     | -808.01623        |
|                                      | CHOCHO                                     | -808.25042        |
|                                      | <b>CHOCHOH</b>                             | <b>-812.61667</b> |
| 3                                    | COCH <sub>2</sub> OH                       | -812.40418        |
|                                      | COCH + H <sub>2</sub> O                    | -812.08371        |
|                                      | COHCHOH                                    | -811.85635        |
|                                      | <b>CHOHCHOH</b>                            | <b>-817.08981</b> |
| 4                                    | CHOCH <sub>2</sub> OH                      | -816.21638        |
|                                      | CH <sub>2</sub> OCHOH                      | -815.88745        |
|                                      | CHOCH + H <sub>2</sub> O                   | -815.44839        |
|                                      | <b>CH<sub>2</sub>OHCHOH</b>                | <b>-820.14588</b> |
| 5                                    | CHOHCH <sub>2</sub> OH                     | -820.12281        |
|                                      | CHOHCH + H <sub>2</sub> O                  | -819.41174        |
|                                      | CHCHOH + H <sub>2</sub> O                  | -819.24416        |
|                                      | <b>CH<sub>2</sub>CHOH + H<sub>2</sub>O</b> | <b>-824.7696</b>  |
| 6                                    | CH <sub>3</sub> OHCHOH                     | -823.5143         |
|                                      | CH <sub>2</sub> OHCH <sub>2</sub> OH       | -823.97908        |
|                                      | CH <sub>2</sub> OHCH + H <sub>2</sub> O    | -822.48591        |
|                                      | <b>CH<sub>3</sub>CHOH</b>                  | <b>-813.61466</b> |
| 7                                    | CH <sub>2</sub> CH <sub>2</sub> OH         | -813.43481        |
|                                      | CH <sub>2</sub> CH + H <sub>2</sub> O      | -812.60829        |

In a series of continuous H<sup>+</sup> transfer processes, different hydrogenation positions are considered, and the state with the lowest energy is selected and marked in blue (as shown in Table S4). The initial step is the hydrogenation of \*CO. It can be seen that the total energy required for adding one \*H to the carbon atom of \*CO to form \*CHO, is lower than that for adding \*H to the oxygen of \*CO to form \*COH. Therefore, \*CHO is considered the result of \*CO hydrogenation. Subsequently, \*CO-\*CHO coupling occurs and the hydrogenation processes continue. The different situations of the hydrogenation of \*CO-\*CHO illustrate that \*COCHOH is the state with the lowest energy. Similarly, \*CHOCHOH, \*CHOHCHOH, \*CH<sub>2</sub>OHCHOH, \*CH<sub>2</sub>CHOH, and \*CH<sub>3</sub>CHOH are the results of a series of cascading hydrogenation reactions.

**Table S6** Different intermediates potentially formed with different numbers of H<sup>+</sup> transfers for ethanol generation at low \*CO coverage

| Number of H <sup>+</sup> transferred | Intermediate        | Energy (eV)       |
|--------------------------------------|---------------------|-------------------|
| 1                                    | <b>CHO</b>          | <b>-772.54737</b> |
|                                      | COH                 | -770.28191        |
|                                      | <b>COCHOH</b>       | <b>-775.72891</b> |
| 2                                    | COCH <sub>2</sub> O | -775.69805        |
|                                      | COHCHO              | -775.44682        |
|                                      | CHOCHO              | -775.38418        |

| Number of H <sup>+</sup> transferred | Intermediate                            | Energy (eV) |
|--------------------------------------|-----------------------------------------|-------------|
| 3                                    | CHOCHOH                                 | -779.74153  |
|                                      | COCH <sub>2</sub> OH                    | -779.66037  |
|                                      | COCH + H <sub>2</sub> O                 | -779.23103  |
|                                      | COHCHOH                                 | -778.82308  |
| 4                                    | CHOHCHOH                                | -784.22011  |
|                                      | CHOCH <sub>2</sub> OH                   | -783.28004  |
|                                      | CH <sub>2</sub> OCHOH                   | -783.26036  |
|                                      | CHOCH + H <sub>2</sub> O                | -781.78617  |
| 5                                    | CH <sub>2</sub> OHCHOH                  | -787.22776  |
|                                      | CHOHCH <sub>2</sub> OH                  | -787.1894   |
|                                      | CHOHCH + H <sub>2</sub> O               | -786.53899  |
|                                      | CHCHOH + H <sub>2</sub> O               | -786.26208  |
| 6                                    | CH <sub>2</sub> CHOH + H <sub>2</sub> O | -791.88701  |
|                                      | CH <sub>3</sub> OHCHOH                  | -791.37778  |
|                                      | CH <sub>2</sub> OHCH <sub>2</sub> OH    | -791.21733  |
|                                      | CH <sub>2</sub> OHCH + H <sub>2</sub> O | -789.58538  |
| 7                                    | CH <sub>3</sub> CHOH                    | -780.716    |
|                                      | CH <sub>2</sub> CH <sub>2</sub> OH      | -780.51346  |
|                                      | CH <sub>2</sub> CH + H <sub>2</sub> O   | -779.70392  |

The optimal hydrogenation results for the ethanol pathway at low \*CO coverage are similar to those at high \*CO coverage, as shown in Table S5, highlighted in blue.

**Table S7** Different intermediates potentially formed with different numbers of H<sup>+</sup> transfers for methanol generation at high \*CO coverage

| Number of H <sup>+</sup> transferred | Intermediate       | Energy (eV) |
|--------------------------------------|--------------------|-------------|
| 1                                    | CHO                | -805.29535  |
|                                      | COH                | -803.35949  |
| 2                                    | CH <sub>2</sub> O  | -809.35756  |
|                                      | CHOH               | -808.78468  |
| 3                                    | CH <sub>3</sub> O  | -813.23303  |
|                                      | CH <sub>2</sub> OH | -813.00428  |

In a series of continuous H<sup>+</sup> transfer processes, different hydrogenation positions are considered, and the state with the lowest energy is selected and marked in blue (as shown in Table S6). The initial step involves the hydrogenation of \*CO. It can be seen that the total energy for adding one \*H to the carbon atom of \*CO to form \*CHO, is lower than that for adding \*H to the oxygen of \*CO to form \*COH. Therefore, \*CHO is considered the result of \*CO hydrogenation. Subsequently, the hydrogenation of \*CHO continues. The different situations of \*CHO hydrogenation illustrate that \*CH<sub>2</sub>O is the state with the lowest energy. Likewise, \*CH<sub>3</sub>O is the result of the subsequent hydrogenation step.

**Table S8** Different intermediates potentially formed with different numbers of H<sup>+</sup> transfers for methanol generation at low \*CO coverage

| Number of H <sup>+</sup> transferred | Intermediate       | Energy (eV) |
|--------------------------------------|--------------------|-------------|
| 1                                    | CHO                | -772.54737  |
|                                      | COH                | -770.28191  |
| 2                                    | CH <sub>2</sub> O  | -776.45335  |
|                                      | CHOH               | -775.8547   |
| 3                                    | CH <sub>3</sub> O  | -780.4859   |
|                                      | CH <sub>2</sub> OH | -780.39353  |

The optimal hydrogenation results for the methanol pathway at low \*CO coverage are similar to those at high \*CO coverage and are displayed in [Table S7](#), highlighted in blue.

**Table S9** Possible reaction pathway during the overall PCRR to ethanol on the catalyst

| Ethanol reaction pathway                                                                                       |
|----------------------------------------------------------------------------------------------------------------|
| $\text{CO}_2 + \text{e}^- \rightarrow \text{CO}_2^-$                                                           |
| $\text{CO}_2^- + \text{H}^+ + \text{e}^- \rightarrow \text{*COOH}$                                             |
| $\text{*COOH} + \text{H}^+ + \text{e}^- \rightarrow \text{*CO} + \text{H}_2\text{O}$                           |
| $\text{*CO} + \text{H}^+ + \text{e}^- \rightarrow \text{*CHO}$                                                 |
| $\text{*CO} + \text{*CHO} + \text{e}^- \rightarrow \text{*COCHO} + \text{*}$                                   |
| $\text{*COCHO} + \text{H}^+ + \text{e}^- \rightarrow \text{*COCHOH}$                                           |
| $\text{*COCHOH} + \text{H}^+ + \text{e}^- \rightarrow \text{*CHOCHOH}$                                         |
| $\text{*CHOCHOH} + \text{H}^+ + \text{e}^- \rightarrow \text{*CHOHCHOH}$                                       |
| $\text{*CHOHCHOH} + \text{H}^+ + \text{e}^- \rightarrow \text{*CH}_2\text{OHCHOH}$                             |
| $\text{*CH}_2\text{OHCHOH} + \text{H}^+ + \text{e}^- \rightarrow \text{*CH}_2\text{CHOH} + \text{H}_2\text{O}$ |
| $\text{*CH}_2\text{CHOH} + \text{H}^+ + \text{e}^- \rightarrow \text{*CH}_3\text{CHOH}$                        |
| $\text{*CH}_3\text{CHOH} + \text{H}^+ + \text{e}^- \rightarrow \text{*CH}_3\text{CH}_2\text{OH}$               |
| $\text{*CH}_3\text{CH}_2\text{OH} \rightarrow \text{CH}_3\text{CH}_2\text{OH (g)} + \text{e}^- + \text{*}$     |

**Table S10** Possible reaction pathway during the overall PCRR to methanol on the catalyst

| Methanol reaction pathway                                                            |
|--------------------------------------------------------------------------------------|
| $\text{CO}_2 + \text{e}^- \rightarrow \text{CO}_2^-$                                 |
| $\text{CO}_2^- + \text{H}^+ + \text{e}^- \rightarrow \text{*COOH}$                   |
| $\text{*COOH} + \text{H}^+ + \text{e}^- \rightarrow \text{*CO} + \text{H}_2\text{O}$ |
| $\text{*CO} + \text{H}^+ + \text{e}^- \rightarrow \text{*CHO}$                       |
| $\text{*CHO} + \text{H}^+ + \text{e}^- \rightarrow \text{*CH}_2\text{O}$             |
| $\text{*CH}_2\text{O} + \text{H}^+ + \text{e}^- \rightarrow \text{*CH}_3\text{O}$    |
| $\text{*CH}_3\text{O} + \text{H}^+ + \text{e}^- \rightarrow \text{*CH}_3\text{OH}$   |
| $\text{*CH}_3\text{OH} \rightarrow \text{CH}_3\text{OH (g)} + \text{e}^- + \text{*}$ |

**Table S11** Thermochemical data of the reactants and products for the overall PCRR

| Compound | Chemical formula                   | $\Delta_f G_i^\ominus$ (kJ mol <sup>-1</sup> ) |
|----------|------------------------------------|------------------------------------------------|
| Ethanol  | CH <sub>3</sub> CH <sub>2</sub> OH | -174.8                                         |

| Compound       | Chemical formula | $\Delta_f G_i^\ominus$ (kJ mol <sup>-1</sup> ) |
|----------------|------------------|------------------------------------------------|
| Carbon dioxide | CO <sub>2</sub>  | -394.4                                         |
| Oxygen         | O <sub>2</sub>   | 0                                              |
| Water          | H <sub>2</sub> O | -237.1                                         |



## References

- 1 H. Liu and G. Cao, *Sci Rep*, 2016, **6**, 23936.
- 2 J. Mo, J. Sha, D. Li, Z. Li and Y. Chen, *Nanoscale*, 2019, **11**, 8408-8415.
- 3 J. Li, G. Chen, Y. Zhu, Z. Liang, A. Pei, C.-L. Wu, H. Wang, H. R. Lee, K. Liu, S. Chu and Y. Cui, *Nat. Catal.*, 2018, **1**, 592-600.
- 4 W. M. Haynes, *CRC handbook of chemistry and physics*, CRC, 2016.
- 5 R. T. Rashid, Y. Chen, X. Liu, F. A. Chowdhury, M. Liu, J. Song, Z. Mi and B. Zhou, *Proc. Natl. Acad. Sci. U. S. A.*, 2022, **119**, e2121174119.
- 6 S. Bai, H. Qiu, M. Song, G. He, F. Wang, Y. Liu and L. Guo, *eScience*, 2022, **2**, 428-437.
- 7 Y. A. Wu, I. McNulty, C. Liu, K. C. Lau, Q. Liu, A. P. Paulikas, C.-J. Sun, Z. Cai, J. R. Guest, Y. Ren, V. Stamenkovic, L. A. Curtiss, Y. Liu and T. Rajh, *Nat. Energy*, 2019, **4**, 957-968.
- 8 P.-L. Wang, W. Zhang, Q. Yuan, T. Mai, M.-Y. Qi and M.-G. Ma, *J. Colloid Interface Sci.*, 2023, **645**, 306-318.
- 9 H. Porschke and E. Broda, *Nature*, 1961, **190**, 257-258.
- 10 P. Zhang, T. Wang, X. Chang, L. Zhang and J. Gong, *Angew. Chem. Int. Ed.*, 2016, **128**, 5945-5949.
- 11 Y. Kuwahara, J. Aoyama, K. Miyakubo, T. Eguchi, T. Kamegawa, K. Mori and H. Yamashita, *J. Catal.*, 2012, **285**, 223-234.
- 12 C. Gao, Z. Sun, K. Li, Y. Chen, Y. Cao, S. Zhang and L. Feng, *Energ. Environ. Sci.*, 2013, **6**, 1147-1151.
- 13 Z. Li, N. Xiong and G. Gu, *Dalton Trans.*, 2018, **48**, 182-189.
- 14 H. Yu, S. Qu, P. R. Chen, K. Q. Ou, J. Y. Lin, Z. H. Guo, L. Zheng, J. K. Li, S. Huang, Y. Teng, L. Zou and J. L. Song, *J. Hazard. Mater.*, 2022, **430**, 128351.
- 15 X. Liu, L. Cao, W. Sun, Z. Zhou and J. Yang, *Res. Chem. Intermed.*, 2016, **42**, 6289-6300.
- 16 Z. He, J. Fu, B. Cheng, J. Yu and S. Cao, *Appl. Catal. B*, 2017, **205**, 104-111.
- 17 M. P. r. S. Gonza'lez, M. Barrera, A. R. Gonza'lez Elipe, and R. M. Souto, *J. Phys. Chem. B*, 1998, **102**, 5483-5489.
- 18 C. Y. Toe, J. Scott, R. Amal and Y. H. Ng, *J. Photoch. Photobio. C*, 2019, **40**, 191-211.
- 19 R. D. Zhonghai Zhang, Lianbin Zhang, Haibo Zhu, Hongnan Zhang, and Peng Wang, *ACS Nano*, 2013, **7**, 1709-1717.
- 20 C. Y. Toe, Z. Zheng, H. Wu, J. Scott, R. Amal and Y. H. Ng, *Angew. Chem. Int. Ed.*, 2018, **57**, 13613-13617.
- 21 Y. Xia, K. Xiao, B. Cheng, J. Yu, L. Jiang, M. Antonietti and S. Cao, *ChemSusChem*, 2020, **13**, 1730-1734.
- 22 R. Das, K. Das, B. Ray, C. P. Vinod and S. C. Peter, *Energ. Environ. Sci.*, 2022, **15**, 1967-1976.
- 23 J. Mao, T. Peng, X. Zhang, K. Li, L. Ye and L. Zan, *Catal. Sci. Technol.*, 2013, **3**, 1253-1260.
- 24 Y. Liu, B. Huang, Y. Dai, X. Zhang, X. Qin, M. Jiang and M.-H. Whangbo, *Catal. Commun.*, 2009, **11**, 210-213.
- 25 O. Ola and M. M. Maroto-Valer, *Appl. Catal. A*, 2015, **502**, 114-121.
- 26 M. Cheng, S. Yang, R. Chen, X. Zhu, Q. Liao and Y. Huang, *Int. J. Hydrogen Energy*, 2017, **42**, 9722-9732.
- 27 L. Pastrana-Martínez, A. Silva, N. Fonseca, J. Vaz, J. Figueiredo and J. Faria, *Top. Catal.*, 2016, **59**, 1279-1291.
- 28 Y. Zhu, Z. Xu, Q. Lang, W. Jiang, Q. Yin, S. Zhong and S. Bai, *Appl. Catal. B*, 2017, **206**, 282-292.
- 29 V. Jeyalakshmi, R. Mahalakshmy, K. R. Krishnamurthy and B. Viswanathan, *Catal. Today*, 2016, **266**, 160-167.
- 30 X.-H. Xia, Z.-J. Jia, Y. Yu, Y. Liang, Z. Wang and L.-L. Ma, *Carbon*, 2007, **45**, 717-721.
- 31 L. Hurtado, R. Natividad and H. García, *Catal. Commun.*, 2016, **84**, 30-35.
- 32 Q. Han, Y. Zhou, L. Tang, P. Li, W. Tu, L. Li, H. Li and Z. Zou, *RSC Adv.*, 2016, **6**, 90792-90796.
- 33 A. Meng, S. Wu, B. Cheng, J. Yu and J. Xu, *J. Mater. Chem. A*, 2018, **6**, 4729-4736.
- 34 O. Ola and M. M. Maroto-Valer, *J. Catal.*, 2014, **309**, 300-308.
- 35 J.-P. Zou, D.-D. Wu, J. Luo, Q.-J. Xing, X.-B. Luo, W.-H. Dong, S.-L. Luo, H.-M. Du and S. L. Suib, *ACS Catal.*, 2016, **6**, 6861-6867.
- 36 M. Abou Asi, C. He, M. Su, D. Xia, L. Lin, H. Deng, Y. Xiong, R. Qiu and X.-z. Li, *Catal. Today*, 2011, **175**, 256-263.
- 37 Y. He, Y. Wang, L. Zhang, B. Teng and M. Fan, *Appl. Catal. B*, 2015, **168**, 1-8.
- 38 Y. He, L. Zhang, B. Teng and M. Fan, *Energ. Environ. Sci. Technol.*, 2015, **49**, 649-656.
- 39 S. Bai, X. Wang, C. Hu, M. Xie, J. Jiang and Y. Xiong, *Chem. Commun.*, 2014, **50**, 6094-6097.
- 40 N.-N. Vu, C.-C. Nguyen, S. Kaliaguine and T.-O. Do, *Adv. Sustainable Syst.*, 2017, **1**, 1700048.
- 41 A. Wang, S. Shen, Y. Zhao and W. Wu, *J. Colloid Interface Sci.*, 2015, **445**, 330-336.
- 42 M. Abou Asi, L. Zhu, C. He, V. K. Sharma, D. Shu, S. Li, J. Yang and Y. Xiong, *Catal. Today*, 2013, **216**, 268-275.
- 43 B. Cai, J. Wang, S. Gan, D. Han, Z. Wu and L. Niu, *J. Mater. Chem. A*, 2014, **2**, 5280-5286.
- 44 V. Jeyalakshmi, R. Mahalakshmy, K. R. Krishnamurthy and B. Viswanathan, *Catal. Today*, 2018, **300**, 152-159.
- 45 L. Tang, L. Kuai, Y. Li, H. Li, Y. Zhou and Z. Zou, *Nanotechnology*, 2018, **29**, 064003.
- 46 T. Peng, K. Wang, S. He, X. Chen, W. Dai and X. Fu, *Catal. Sci. Technol.*, 2021, **11**, 2261-2272.
- 47 V. Jeyalakshmi, S. Tamilmani, R. Mahalakshmy, P. Bhyrappa, K. R. Krishnamurthy and B. Viswanathan, *J. Mol. Catal. A: Chem.*, 2016, **420**, 200-207.
- 48 G. Wang, C. T. He, R. Huang, J. Mao, D. Wang and Y. Li, *J. Am. Chem. Soc.*, 2020, **142**, 19339-19345.
- 49 Y. Wang, H. Jia, H. Gong, L. Zhou, Z. Qiu, X. Fang and T. Du, *Chem. Eng. J.*, 2021, **426**, 130877.
- 50 P. Xia, M. Antonietti, B. Zhu, T. Heil, J. Yu and S. Cao, *Adv. Funct. Mater.*, 2019, **29**, 1900093.
- 51 S. Gao, H. Guan, H. Wang, X. Yang, W. Yang and Q. Li, *J. Adv. Ceram.*, 2022, **11**, 1404-1416.
- 52 H. Yu, C. Sun, Y. Xuan, K. Zhang and K. Chang, *Chem. Eng. J.*, 2022, **430**, 132940.
- 53 Q. Jia, J. Zhou, L. Gong, L. Wang, X. Ma and Y. Zhao, *Mol. Catal.*, 2022, **530**, 112599.
- 54 P. Li, L. Liu, W. An, H. Wang and W. Cui, *Appl. Surf. Sci.*, 2021, **565**, 150448.
- 55 P. Li, L. Liu, W. An, H. Wang, H. Guo, Y. Liang and W. Cui, *Appl. Catal. B*, 2020, **266**, 118618.
- 56 J. Cai, Y. Xiao, Y. Tursun and A. Abulizi, *Mater. Sci. Semicond. Process.*, 2022, **149**, 106891.
- 57 P. Seeharaj, N. Vittayakorn, J. Morris and P. Kim-Lohsoontorn, *Nanotechnology*, 2021, **32**, 375707.
- 58 H. Shi, H. Wang, Y. Zhou, J. Li, P. Zhai, X. Li, G. G. Gurzadyan, J. Hou, H. Yang and X. Guo, *Angew. Chem. Int. Ed.*, 2022, **61**, e202208904.
- 59 Y. Huang, P. Du, W.-X. Shi, Y. Wang, S. Yao, Z.-M. Zhang, T.-B. Lu and X. Lu, *Appl. Catal. B*, 2021, **288**, 120001.

- 60 K. Wu, C. Liu, Y. Chen, H. Jiang, Q. Peng, Y. Chen, D. Fang, B. Shen, Q. Wu, L. Zhan, W. Sun, W. Di and H. Sun, *Appl. Catal. A*, 2023, **650**, 118970.
- 61 H. Fu, T. Zhang, A. Abulizi, K. Okitsu and Y. Tursun, *J. Ind. Eng. Chem.*, 2023, **117**, 510-521.
- 62 F. Xu, K. Meng, B. Cheng, S. Wang, J. Xu and J. Yu, *Nat. Commun.*, 2020, **11**, 4613.
